# Supplementary material for: Circular RNA circNOL10 Inhibits Lung Cancer Development by Promoting SCLM1‐Mediated Transcriptional Regulation of the Humanin Polypeptide Family
Source: PubMed Central journal article supplement (PMC6343086; doi:10.1002/advs.201800654), 2018-11-16
Supplement: ADVS-6-1800654-s001.pdf [file ADVS-6-1800654-s001.pdf]

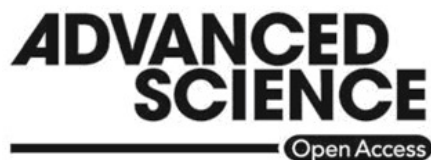

## Supporting Information

for *Adv. Sci.*, DOI: 10.1002/adv.201800654

**Circular RNA circNOL10 Inhibits Lung Cancer Development by Promoting SCLM1-Mediated Transcriptional Regulation of the Humanin Polypeptide Family**

*Aruo Nan, Lijian Chen, Nan Zhang, Yangyang Jia, Xin Li, Hanyu Zhou, Yihui Ling, Zhishan Wang, Chengfeng Yang, Sijin Liu, and Yiguo Jiang\**

# Supplementary Materials

## Supplemental Figures

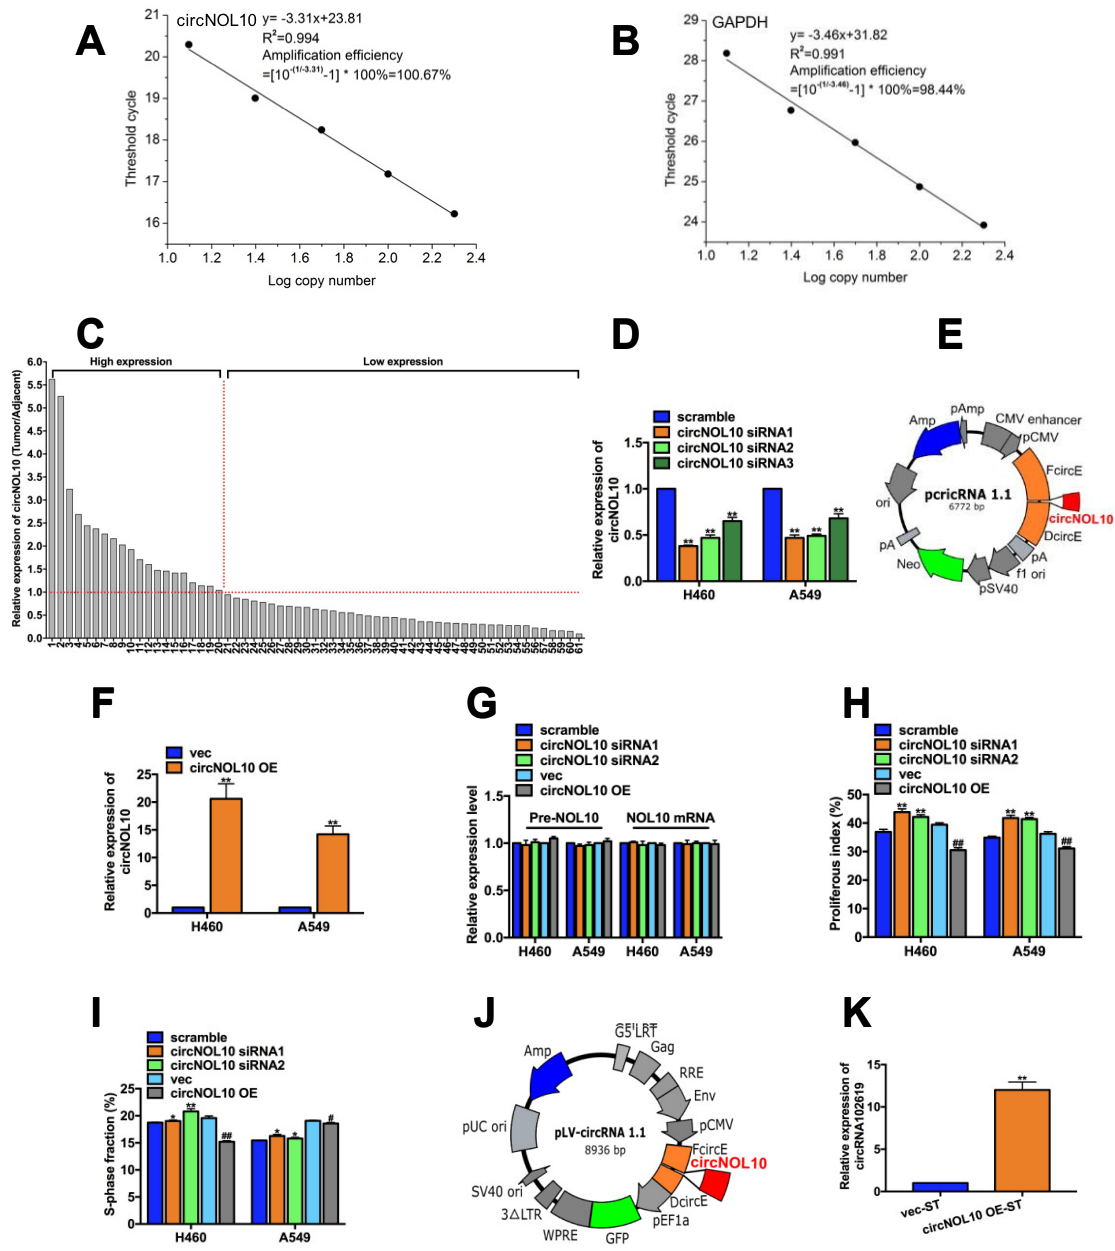

**Supplemental Figure 1 (related to Figures 1 and 2). Significant inhibitory effect of circNOL10 on lung cancer development in vitro and in vivo.**

(A and B) Amplification efficiencies of the primers for the gene of interest (circNOL10) and reference gene (GAPDH) were 100.67% and 98.44%, respectively.

(C) circNOL10 mRNA expression in 61 cases of human lung cancer and matched paracancerous tissues, determined with qPCR. Twenty cases showed high circNOL10 expression and 41 cases showed low expression.

(D) Silencing efficiency of transient transfection with three siRNAs in H460 and

A549 cells; n = 3, mean ± SD, unpaired t-test, \*\*P<0.01.

(E) circNOL10-specific overexpression vector for transient transfection.

(F) Overexpression efficiency of transient transfection with circNOL10 overexpression vector in H460 and A549 cells; n = 3, mean ± SD, unpaired t-test, \*\*P<0.01.

(G) Expression of pre-NOL10 and NOL10 mRNAs in H460 and A549 cells after silencing or overexpressing circNOL10, detected with qPCR; n = 3, mean ± SD, unpaired t-test, not significant.

(H, I) Cell proliferation index and proportion of S-phase cells detected with flow cytometry (FCM); n = 3, mean ± SD, unpaired t-test, \*\*P<0.01. Related to Figure 1L.

(J) Green fluorescent protein-labeled circNOL10 specific overexpression vector for stable transfection.

(K) Efficiency of stable transfection with circNOL10 overexpression vector in H460 cells. n = 3, mean ± SD, unpaired t-test, \*\*P<0.01.

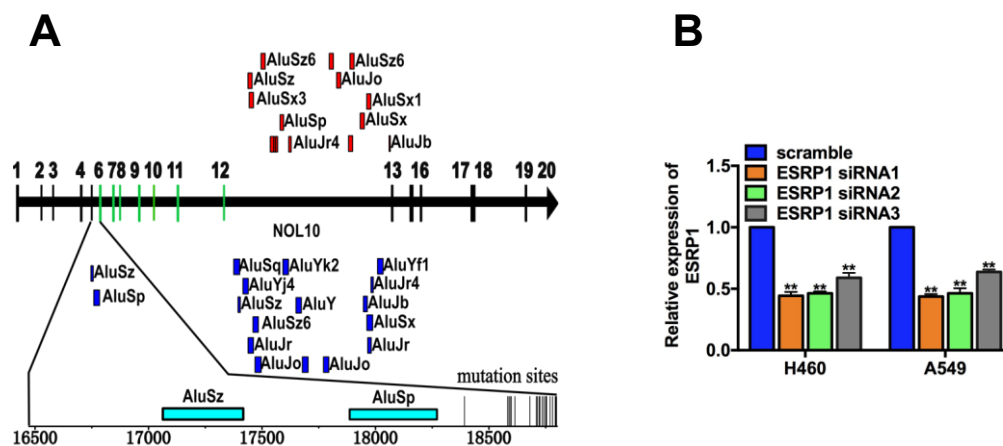

### Supplemental Figure 2 (related to Figure 3). Low-expression mechanism of circNOL10 in lung cancer.

(A) Sequencing of flanking intron region in circNOL10. There were few mutation sites and the detected mutation sites were not in the circNOL10-associated circularization region.

(B) Silencing efficiency of transient transfection with three ESRP1 siRNAs in H460 and A549 cells; n = 3, mean ± SD, unpaired t-test, \*\*P<0.01.

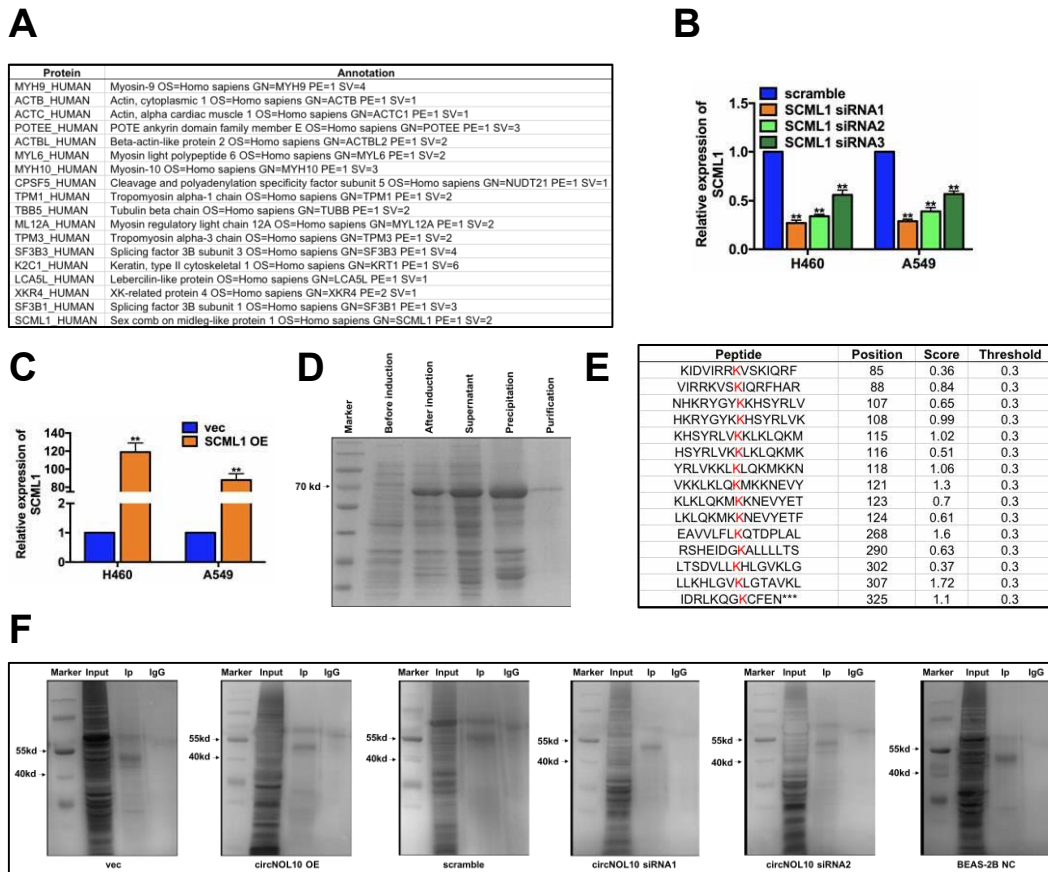

### Supplemental Figure 3 (related to Figure 4). Mechanism of circNOL10 in regulating transcription factor SCML1.

(A) Proteins with a relatively high abundance in circNOL10 pull-down-MS included SCML1.

(B) Silencing efficiency of transient transfection with three SCML1 siRNAs in H460 and A549 cells;  $n = 3$ , mean  $\pm$  SD, unpaired t-test,  $**P < 0.01$ .

(C) Efficiency of transient transfection with SCML1 overexpression vector in H460 and A549 cells;  $n = 3$ , mean  $\pm$  SD, unpaired t-test,  $**P < 0.01$ .

(D) Silver staining of prokaryotically expressed and purified SCML1 protein, used for the detection of RNA EMSA.

(E) SCML1 ubiquitination sites (red indicates predicted ubiquitination sites).

(F) Silver staining of proteins obtained by SCML1 co-immunoprecipitation.

circNOL10 was silenced or overexpressed in H460 cells and BEAS-2B cells were untreated.

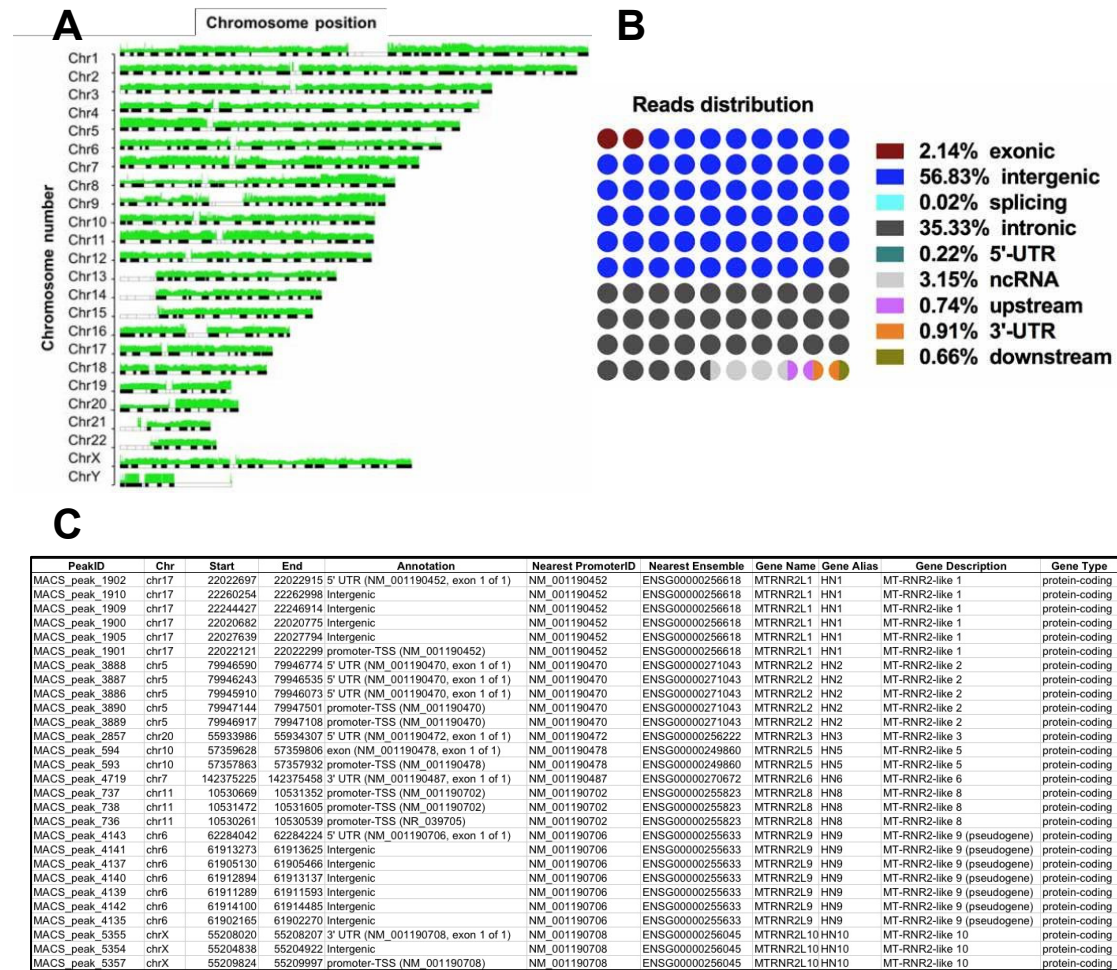

**Supplemental Figure 4 (related to Figure 5). Mechanism of SCML1 in regulating HN peptide family.**

(A) Chromosomal distribution of SCML1 ChIP-Seq reads. Horizontal axis represents chromosome position, vertical axis represents chromosome number, and green curve represents read abundance (the higher the peak, the more reads in this position).

(B) Distribution of SCML1 ChIP-Seq reads in different genomic regions (exonic, intergenic, splicing, intronic, 5'-untranslated region (UTR), non-coding RNA (ncRNA), upstream, 3'-UTR and downstream).

(C) Related gene information for the HN peptide family identified with SCML1 ChIP-Seq.

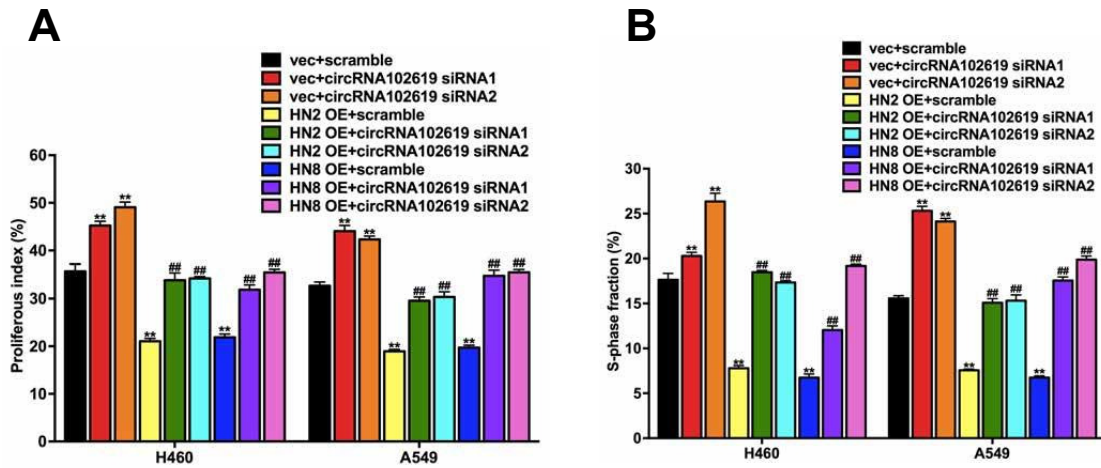

**Supplemental Figure 5 (related to Figure 6). Function of circNOL10 in lung cancer cells through regulating HN peptide family.**

(A, B) Cell proliferation index and proportion of S-phase cells by FCM (n = 3, mean ± SD). Unpaired t-tests were used to compare different treatment groups and control groups (vec+scramble), \*\*P<0.01. ANOVA was used to compare different treatment groups, ## P< 0.01.

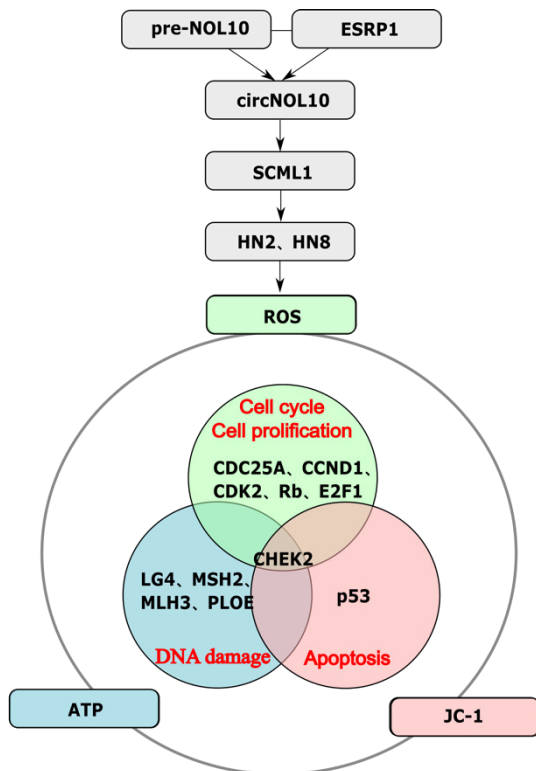

**Supplemental Figure 6. Schematic figure of the regulatory mechanism of circNOL10.**

**Supplemental Table 1. High-throughput circRNA data**

| <b>probeID</b> | <b>Fold<br/>Change</b> | <b>FC (abs)</b> | <b>Log Fold<br/>change</b> | <b>Regulation</b> | <b>circRNA</b>     | <b>Alias</b>     |
|----------------|------------------------|-----------------|----------------------------|-------------------|--------------------|------------------|
| ASCRP000002    | -2.5813426             | 2.5813426       | -1.3681216                 | down              | hsa_circRNA_000010 | hsa_circ_0000263 |
| ASCRP000004    | -2.6014376             | 2.6014376       | -1.3793091                 | down              | hsa_circRNA_000031 | hsa_circ_0000009 |
| ASCRP000006    | -2.6118562             | 2.6118562       | -1.3850755                 | down              | hsa_circRNA_000042 | hsa_circ_0000036 |
| ASCRP000007    | -2.3122878             | 2.3122878       | -1.2093209                 | down              | hsa_circRNA_000046 | hsa_circ_0000059 |
| ASCRP000010    | -2.0616887             | 2.0616887       | -1.0438265                 | down              | hsa_circRNA_000094 | hsa_circ_0000247 |
| ASCRP000019    | -4.4177762             | 4.4177762       | -2.1433203                 | down              | hsa_circRNA_000178 | hsa_circ_0000549 |
| ASCRP000022    | -3.0940504             | 3.0940504       | -1.6294967                 | down              | hsa_circRNA_000200 | hsa_circ_0000670 |
| ASCRP000026    | -3.3699576             | 3.3699576       | -1.7527305                 | down              | hsa_circRNA_000250 | hsa_circ_0000848 |
| ASCRP000027    | -2.2659371             | 2.2659371       | -1.1801078                 | down              | hsa_circRNA_000274 | hsa_circ_0000919 |
| ASCRP000035    | -2.9793332             | 2.9793332       | -1.5749895                 | down              | hsa_circRNA_000329 | hsa_circ_0001138 |
| ASCRP000045    | -2.9396315             | 2.9396315       | -1.5556353                 | down              | hsa_circRNA_000424 | hsa_circ_0001549 |
| ASCRP000074    | -5.4808939             | 5.4808939       | -2.4544112                 | down              | hsa_circRNA_000596 | hsa_circ_0000661 |
| ASCRP000078    | -3.4605588             | 3.4605588       | -1.791005                  | down              | hsa_circRNA_000618 | hsa_circ_0000708 |
| ASCRP000084    | -2.0844496             | 2.0844496       | -1.0596665                 | down              | hsa_circRNA_000626 | hsa_circ_0000755 |
| ASCRP000085    | -4.8104975             | 4.8104975       | -2.2661861                 | down              | hsa_circRNA_000629 | hsa_circ_0000775 |
| ASCRP000086    | -2.2092061             | 2.2092061       | -1.143528                  | down              | hsa_circRNA_000638 | hsa_circ_0000822 |
| ASCRP000096    | -2.1228304             | 2.1228304       | -1.0859891                 | down              | hsa_circRNA_000676 | hsa_circ_0001234 |
| ASCRP000098    | -45.33666              | 45.3366606      | -5.5026062                 | down              | hsa_circRNA_000684 | hsa_circ_0001013 |
| ASCRP000140    | -8.8101937             | 8.8101937       | -3.1391737                 | down              | hsa_circRNA_000864 | hsa_circ_0000662 |
| ASCRP000144    | -11.029611             | 11.0296118      | -3.4633101                 | down              | hsa_circRNA_000881 | hsa_circ_0000788 |
| ASCRP000150    | -7.9903767             | 7.9903767       | -2.9982635                 | down              | hsa_circRNA_000911 | hsa_circ_0001184 |
| ASCRP000161    | -7.1779314             | 7.1779314       | -2.8435681                 | down              | hsa_circRNA_000950 | hsa_circ_0001525 |
| ASCRP000167    | -3.0573031             | 3.0573031       | -1.6122596                 | down              | hsa_circRNA_000963 | hsa_circ_0001644 |
| ASCRP000172    | -4.1667918             | 4.1667918       | -2.058937                  | down              | hsa_circRNA_000993 | hsa_circ_0001887 |
| ASCRP000174    | -2.0181414             | 2.0181414       | -1.0130272                 | down              | hsa_circRNA_000997 | hsa_circ_0001845 |
| ASCRP000179    | -2.4699397             | 2.4699397       | -1.3044758                 | down              | hsa_circRNA_001036 | hsa_circ_0000436 |
| ASCRP000199    | -4.2371127             | 4.2371127       | -2.0830815                 | down              | hsa_circRNA_001096 | hsa_circ_0000866 |
| ASCRP000231    | -2.722984              | 2.722984        | -1.4451885                 | down              | hsa_circRNA_001225 | hsa_circ_0000305 |
| ASCRP000253    | -7.1985053             | 7.1985053       | -2.8476974                 | down              | hsa_circRNA_001350 | hsa_circ_0000253 |

|             |            |            |            |      |                    |                  |
|-------------|------------|------------|------------|------|--------------------|------------------|
| ASCRP000254 | -2.0309892 | 2.0309892  | -1.0221826 | down | hsa_circRNA_001355 | hsa_circ_0000312 |
| ASCRP000256 | -2.3592331 | 2.3592331  | -1.238318  | down | hsa_circRNA_001363 | hsa_circ_0000172 |
| ASCRP000263 | -2.9059766 | 2.9059766  | -1.5390231 | down | hsa_circRNA_001389 | hsa_circ_0000729 |
| ASCRP000267 | -2.9788281 | 2.9788281  | -1.5747449 | down | hsa_circRNA_001405 | hsa_circ_0001167 |
| ASCRP000303 | -3.4304586 | 3.4304586  | -1.7784014 | down | hsa_circRNA_001594 | hsa_circ_0001343 |
| ASCRP000308 | -3.4192764 | 3.4192764  | -1.7736911 | down | hsa_circRNA_001622 | hsa_circ_0000144 |
| ASCRP000310 | -15.452945 | 15.4529451 | -3.9498099 | down | hsa_circRNA_001653 | hsa_circ_0001568 |
| ASCRP000311 | -8.3350025 | 8.3350025  | -3.0591826 | down | hsa_circRNA_001654 | hsa_circ_0001605 |
| ASCRP000384 | -2.206182  | 2.206182   | -1.1415518 | down | hsa_circRNA_002143 | hsa_circ_0001907 |
| ASCRP000414 | -4.3617806 | 4.3617806  | -2.1249172 | down | hsa_circRNA_100024 | hsa_circ_0009135 |
| ASCRP000434 | -10.626184 | 10.6261847 | -3.4095518 | down | hsa_circRNA_100044 | hsa_circ_0009654 |
| ASCRP000459 | -5.1948437 | 5.1948437  | -2.3770803 | down | hsa_circRNA_100069 | hsa_circ_0002733 |
| ASCRP000462 | -2.5503107 | 2.5503107  | -1.350673  | down | hsa_circRNA_100072 | hsa_circ_0005562 |
| ASCRP000463 | -2.5331061 | 2.5331061  | -1.3409075 | down | hsa_circRNA_100073 | hsa_circ_0010358 |
| ASCRP000557 | -2.4018306 | 2.4018306  | -1.2641344 | down | hsa_circRNA_100168 | hsa_circ_0004660 |
| ASCRP000570 | -3.8293529 | 3.8293529  | -1.9371006 | down | hsa_circRNA_100181 | hsa_circ_0011929 |
| ASCRP000575 | -2.1382768 | 2.1382768  | -1.0964486 | down | hsa_circRNA_100186 | hsa_circ_0000063 |
| ASCRP000591 | -4.8075969 | 4.8075969  | -2.2653159 | down | hsa_circRNA_100202 | hsa_circ_0012185 |
| ASCRP000611 | -4.4652407 | 4.4652407  | -2.158738  | down | hsa_circRNA_100223 | hsa_circ_0012417 |
| ASCRP000618 | -2.0632634 | 2.0632634  | -1.044928  | down | hsa_circRNA_100230 | hsa_circ_0009076 |
| ASCRP000660 | -2.3442028 | 2.3442028  | -1.2290974 | down | hsa_circRNA_100272 | hsa_circ_0004463 |
| ASCRP000706 | -2.542756  | 2.542756   | -1.346393  | down | hsa_circRNA_100319 | hsa_circ_0013912 |
| ASCRP000714 | -2.9656454 | 2.9656454  | -1.5683461 | down | hsa_circRNA_100329 | hsa_circ_0006352 |
| ASCRP000746 | -2.3741001 | 2.3741001  | -1.2473808 | down | hsa_circRNA_100361 | hsa_circ_0008339 |
| ASCRP000776 | -2.6384245 | 2.6384245  | -1.3996767 | down | hsa_circRNA_100391 | hsa_circ_0015243 |
| ASCRP000779 | -3.8329609 | 3.8329609  | -1.9384593 | down | hsa_circRNA_100395 | hsa_circ_0015278 |
| ASCRP000803 | -4.9425512 | 4.9425512  | -2.3052559 | down | hsa_circRNA_100420 | hsa_circ_0015787 |
| ASCRP000816 | -3.1270904 | 3.1270904  | -1.6448209 | down | hsa_circRNA_100433 | hsa_circ_0003600 |
| ASCRP000821 | -2.4335872 | 2.4335872  | -1.2830845 | down | hsa_circRNA_100438 | hsa_circ_0006827 |
| ASCRP000830 | -2.8121844 | 2.8121844  | -1.4916912 | down | hsa_circRNA_100447 | hsa_circ_0016418 |
| ASCRP000836 | -27.52202  | 27.5220205 | -4.7825145 | down | hsa_circRNA_100453 | hsa_circ_0008659 |
| ASCRP000880 | -12.200351 | 12.2003516 | -3.6088508 | down | hsa_circRNA_100498 | hsa_circ_0017109 |
| ASCRP000906 | -2.5368909 | 2.5368909  | -1.3430615 | down | hsa_circRNA_100525 | hsa_circ_0017443 |



|             |            |            |            |      |                    |                  |
|-------------|------------|------------|------------|------|--------------------|------------------|
| ASCRP000929 | -2.8030209 | 2.8030209  | -1.4869825 | down | hsa_circRNA_100549 | hsa_circ_0004630 |
| ASCRP000949 | -2.1428163 | 2.1428163  | -1.0995082 | down | hsa_circRNA_100570 | hsa_circ_0001963 |
| ASCRP000981 | -2.4763365 | 2.4763365  | -1.3082074 | down | hsa_circRNA_100606 | hsa_circ_0018529 |
| ASCRP000995 | -2.0893639 | 2.0893639  | -1.0630638 | down | hsa_circRNA_100621 | hsa_circ_0018814 |
| ASCRP001030 | -2.4258061 | 2.4258061  | -1.2784643 | down | hsa_circRNA_100656 | hsa_circ_0004896 |
| ASCRP001070 | -2.0956982 | 2.0956982  | -1.067431  | down | hsa_circRNA_100696 | hsa_circ_0008896 |
| ASCRP001087 | -2.5263444 | 2.5263444  | -1.3370513 | down | hsa_circRNA_100713 | hsa_circ_0008915 |
| ASCRP001088 | -2.1252266 | 2.1252266  | -1.0876167 | down | hsa_circRNA_100714 | hsa_circ_0020336 |
| ASCRP001093 | -2.9067863 | 2.9067863  | -1.539425  | down | hsa_circRNA_100719 | hsa_circ_0020390 |
| ASCRP001100 | -3.3442055 | 3.3442055  | -1.7416635 | down | hsa_circRNA_100726 | hsa_circ_0002456 |
| ASCRP001124 | -2.3015782 | 2.3015782  | -1.2026234 | down | hsa_circRNA_100750 | hsa_circ_0020929 |
| ASCRP001133 | -3.9111276 | 3.9111276  | -1.9675846 | down | hsa_circRNA_100759 | hsa_circ_0004099 |
| ASCRP001164 | -2.394036  | 2.394036   | -1.2594449 | down | hsa_circRNA_100790 | hsa_circ_0000288 |
| ASCRP001176 | -2.4615486 | 2.4615486  | -1.2995662 | down | hsa_circRNA_100802 | hsa_circ_0009018 |
| ASCRP001195 | -2.8423144 | 2.8423144  | -1.5070661 | down | hsa_circRNA_100821 | hsa_circ_0005204 |
| ASCRP001219 | -4.4338576 | 4.4338576  | -2.1485624 | down | hsa_circRNA_100845 | hsa_circ_0022614 |
| ASCRP001223 | -2.704715  | 2.704715   | -1.4354766 | down | hsa_circRNA_100849 | hsa_circ_0004291 |
| ASCRP001236 | -3.7707498 | 3.7707498  | -1.9148514 | down | hsa_circRNA_100862 | hsa_circ_0023182 |
| ASCRP001254 | -2.3827077 | 2.3827077  | -1.252602  | down | hsa_circRNA_100881 | hsa_circ_0007722 |
| ASCRP001256 | -3.5627105 | 3.5627105  | -1.8329753 | down | hsa_circRNA_100883 | hsa_circ_0005918 |
| ASCRP001261 | -2.153045  | 2.153045   | -1.1063785 | down | hsa_circRNA_100888 | hsa_circ_0023642 |
| ASCRP001277 | -2.7975538 | 2.7975538  | -1.4841659 | down | hsa_circRNA_100904 | hsa_circ_0007767 |
| ASCRP001343 | -2.0069672 | 2.0069672  | -1.005017  | down | hsa_circRNA_100972 | hsa_circ_0024609 |
| ASCRP001375 | -3.5788038 | 3.5788038  | -1.8394774 | down | hsa_circRNA_101004 | hsa_circ_0000375 |
| ASCRP001410 | -3.0259203 | 3.0259203  | -1.597374  | down | hsa_circRNA_101040 | hsa_circ_0025822 |
| ASCRP001423 | -2.2258901 | 2.2258901  | -1.1543823 | down | hsa_circRNA_101055 | hsa_circ_0026218 |
| ASCRP001426 | -2.0284957 | 2.0284957  | -1.0204103 | down | hsa_circRNA_101058 | hsa_circ_0026285 |
| ASCRP001505 | -12.895423 | 12.8954236 | -3.6887873 | down | hsa_circRNA_101139 | hsa_circ_0028173 |
| ASCRP001527 | -9.8196832 | 9.8196832  | -3.2956765 | down | hsa_circRNA_101164 | hsa_circ_0028602 |
| ASCRP001537 | -2.0031553 | 2.0031553  | -1.0022743 | down | hsa_circRNA_101174 | hsa_circ_0028864 |
| ASCRP001550 | -2.1650518 | 2.1650518  | -1.1144016 | down | hsa_circRNA_101187 | hsa_circ_0006030 |
| ASCRP001570 | -3.3978577 | 3.3978577  | -1.7646255 | down | hsa_circRNA_101207 | hsa_circ_0006689 |
| ASCRP001576 | -18.3349   | 18.3349003 | -4.1965205 | down | hsa_circRNA_101213 | hsa_circ_0029426 |

|             |            |             |            |      |                    |                  |
|-------------|------------|-------------|------------|------|--------------------|------------------|
| ASCRP001582 | -8.6522504 | 8.6522504   | -3.1130754 | down | hsa_circRNA_101219 | hsa_circ_0029584 |
| ASCRP001588 | -2.060739  | 2.060739    | -1.0431618 | down | hsa_circRNA_101225 | hsa_circ_0029633 |
| ASCRP001589 | -2.7558171 | 2.7558171   | -1.4624801 | down | hsa_circRNA_101226 | hsa_circ_0029634 |
| ASCRP001611 | -2.367029  | 2.367029    | -1.2430774 | down | hsa_circRNA_101248 | hsa_circ_0029976 |
| ASCRP001620 | -2.3118206 | 2.3118206   | -1.2090294 | down | hsa_circRNA_101258 | hsa_circ_0004711 |
| ASCRP001639 | -4.0340843 | 4.0340843   | -2.0122412 | down | hsa_circRNA_101278 | hsa_circ_0004217 |
| ASCRP001643 | -2.9654851 | 2.9654851   | -1.5682681 | down | hsa_circRNA_101282 | hsa_circ_0030569 |
| ASCRP001650 | -2.0394544 | 2.0394544   | -1.0281832 | down | hsa_circRNA_101290 | hsa_circ_0030724 |
| ASCRP001664 | -2.8428521 | 2.8428521   | -1.5073391 | down | hsa_circRNA_101305 | hsa_circ_0002807 |
| ASCRP001679 | -4.1363664 | 4.1363664   | -2.048364  | down | hsa_circRNA_101320 | hsa_circ_0031250 |
| ASCRP001693 | -2.510809  | 2.510809    | -1.3281523 | down | hsa_circRNA_101334 | hsa_circ_0002301 |
| ASCRP001732 | -3.5999228 | 3.5999228   | -1.847966  | down | hsa_circRNA_101373 | hsa_circ_0005139 |
| ASCRP001740 | -3.7442496 | 3.7442496   | -1.9046766 | down | hsa_circRNA_101381 | hsa_circ_0004781 |
| ASCRP001775 | -2.8150429 | 2.8150429   | -1.4931569 | down | hsa_circRNA_101416 | hsa_circ_0032821 |
| ASCRP001842 | -45.260254 | 45.2602544  | -5.5001728 | down | hsa_circRNA_101491 | hsa_circ_0034762 |
| ASCRP001876 | -3.2830178 | 3.2830178   | -1.7150226 | down | hsa_circRNA_101525 | hsa_circ_0035381 |
| ASCRP001882 | -3.6074826 | 3.6074826   | -1.8509924 | down | hsa_circRNA_101531 | hsa_circ_0035445 |
| ASCRP001967 | -2.5725046 | 2.5725046   | -1.3631737 | down | hsa_circRNA_101618 | hsa_circ_0000643 |
| ASCRP002053 | -3.1413549 | 3.1413549   | -1.651387  | down | hsa_circRNA_101706 | hsa_circ_0005394 |
| ASCRP002065 | -2.0206257 | 2.0206257   | -1.0148021 | down | hsa_circRNA_101718 | hsa_circ_0038082 |
| ASCRP002102 | -2.878952  | 2.878952    | -1.5255437 | down | hsa_circRNA_101756 | hsa_circ_0038487 |
| ASCRP002204 | -2.1472822 | 2.1472822   | -1.1025118 | down | hsa_circRNA_101861 | hsa_circ_0000714 |
| ASCRP002223 | -2.2011213 | 2.2011213   | -1.1382387 | down | hsa_circRNA_101881 | hsa_circ_0040534 |
| ASCRP002264 | -2.2099414 | 2.2099414   | -1.1440081 | down | hsa_circRNA_101922 | hsa_circ_0041103 |
| ASCRP002286 | -3.6412496 | 3.6412496   | -1.8644336 | down | hsa_circRNA_101945 | hsa_circ_0041392 |
| ASCRP002289 | -2.5772576 | 2.5772576   | -1.3658367 | down | hsa_circRNA_101948 | hsa_circ_0005479 |
| ASCRP002293 | -2.7677825 | 2.7677825   | -1.4687306 | down | hsa_circRNA_101952 | hsa_circ_0041517 |
| ASCRP002298 | -2.8901699 | 2.8901699   | -1.5311543 | down | hsa_circRNA_101958 | hsa_circ_0041555 |
| ASCRP002309 | -2.1649085 | 2.1649085   | -1.114306  | down | hsa_circRNA_101969 | hsa_circ_0041821 |
| ASCRP002325 | -2.5383942 | 2.5383942   | -1.3439161 | down | hsa_circRNA_101988 | hsa_circ_0042196 |
| ASCRP002339 | -3.1657599 | 3.1657599   | -1.6625518 | down | hsa_circRNA_102002 | hsa_circ_0003505 |
| ASCRP002380 | -2.56205   | 2.56205     | -1.3572986 | down | hsa_circRNA_102045 | hsa_circ_0002404 |
| ASCRP002384 | -126.88982 | 126.8898298 | -6.9874326 | down | hsa_circRNA_102049 | hsa_circ_0043278 |

|             |            |            |            |      |                    |                  |
|-------------|------------|------------|------------|------|--------------------|------------------|
| ASCRP002386 | -71.5756   | 71.5755882 | -6.1613957 | down | hsa_circRNA_102051 | hsa_circ_0006220 |
| ASCRP002417 | -2.5852751 | 2.5852751  | -1.3703178 | down | hsa_circRNA_102082 | hsa_circ_0043947 |
| ASCRP002451 | -2.3480965 | 2.3480965  | -1.2314917 | down | hsa_circRNA_102119 | hsa_circ_0044436 |
| ASCRP002491 | -2.9598503 | 2.9598503  | -1.5655242 | down | hsa_circRNA_102159 | hsa_circ_0004006 |
| ASCRP002553 | -4.8312519 | 4.8312519  | -2.2723971 | down | hsa_circRNA_102225 | hsa_circ_0046188 |
| ASCRP002556 | -2.2472194 | 2.2472194  | -1.168141  | down | hsa_circRNA_102228 | hsa_circ_0000814 |
| ASCRP002558 | -2.2087279 | 2.2087279  | -1.1432157 | down | hsa_circRNA_102230 | hsa_circ_0046215 |
| ASCRP002565 | -2.3430707 | 2.3430707  | -1.2284005 | down | hsa_circRNA_102237 | hsa_circ_0046419 |
| ASCRP002572 | -2.0671147 | 2.0671147  | -1.0476184 | down | hsa_circRNA_102244 | hsa_circ_0004063 |
| ASCRP002643 | -7.4705007 | 7.4705007  | -2.9012049 | down | hsa_circRNA_102324 | hsa_circ_0047151 |
| ASCRP002683 | -2.3570486 | 2.3570486  | -1.2369815 | down | hsa_circRNA_102364 | hsa_circ_0007006 |
| ASCRP002717 | -2.0624105 | 2.0624105  | -1.0443315 | down | hsa_circRNA_102398 | hsa_circ_0004003 |
| ASCRP002753 | -2.1752594 | 2.1752594  | -1.1211875 | down | hsa_circRNA_102434 | hsa_circ_0049138 |
| ASCRP002761 | -3.0566132 | 3.0566132  | -1.611934  | down | hsa_circRNA_102442 | hsa_circ_0049271 |
| ASCRP002764 | -11.5913   | 11.5913991 | -3.5349828 | down | hsa_circRNA_102445 | hsa_circ_0004552 |
| ASCRP002765 | -5.6459438 | 5.6459438  | -2.4972148 | down | hsa_circRNA_102446 | hsa_circ_0049356 |
| ASCRP002779 | -2.3757429 | 2.3757429  | -1.2483787 | down | hsa_circRNA_102462 | hsa_circ_0049700 |
| ASCRP002787 | -2.8407414 | 2.8407414  | -1.5062675 | down | hsa_circRNA_102470 | hsa_circ_0049888 |
| ASCRP002801 | -2.3669244 | 2.3669244  | -1.2430137 | down | hsa_circRNA_102484 | hsa_circ_0005571 |
| ASCRP002802 | -4.6505468 | 4.6505468  | -2.2174003 | down | hsa_circRNA_102485 | hsa_circ_0050102 |
| ASCRP002811 | -2.1375547 | 2.1375547  | -1.0959614 | down | hsa_circRNA_102494 | hsa_circ_0004066 |
| ASCRP002823 | -6.2286354 | 6.2286354  | -2.6389161 | down | hsa_circRNA_102509 | hsa_circ_0006446 |
| ASCRP002860 | -3.3830066 | 3.3830066  | -1.758306  | down | hsa_circRNA_102547 | hsa_circ_0008719 |
| ASCRP002915 | -7.097181  | 7.097181   | -2.8272461 | down | hsa_circRNA_102602 | hsa_circ_0052318 |
| ASCRP002928 | -2.1719808 | 2.1719808  | -1.1190113 | down | hsa_circRNA_102615 | hsa_circ_0008768 |
| ASCRP002932 | -38.672235 | 38.6722351 | -5.2732262 | down | hsa_circRNA_102619 | hsa_circ_0000977 |
| ASCRP002937 | -5.1800207 | 5.1800207  | -2.3729579 | down | hsa_circRNA_102624 | hsa_circ_0008261 |
| ASCRP002944 | -4.1780816 | 4.1780816  | -2.0628407 | down | hsa_circRNA_102631 | hsa_circ_0005556 |
| ASCRP003001 | -3.8232086 | 3.8232086  | -1.9347839 | down | hsa_circRNA_102689 | hsa_circ_0054021 |
| ASCRP003033 | -2.8577774 | 2.8577774  | -1.5148935 | down | hsa_circRNA_102721 | hsa_circ_0054598 |
| ASCRP003040 | -2.2440999 | 2.2440999  | -1.1661369 | down | hsa_circRNA_102728 | hsa_circ_0006110 |
| ASCRP003053 | -3.0565513 | 3.0565513  | -1.6119048 | down | hsa_circRNA_102741 | hsa_circ_0003497 |

|             |            |            |            |      |                    |                  |
|-------------|------------|------------|------------|------|--------------------|------------------|
| ASCRP003085 | -2.0453255 | 2.0453255  | -1.0323305 | down | hsa_circRNA_102774 | hsa_circ_0055412 |
| ASCRP003092 | -4.183422  | 4.183422   | -2.0646835 | down | hsa_circRNA_102782 | hsa_circ_0055630 |
| ASCRP003094 | -2.5662816 | 2.5662816  | -1.3596795 | down | hsa_circRNA_102784 | hsa_circ_0055734 |
| ASCRP003115 | -9.4367728 | 9.4367728  | -3.2382936 | down | hsa_circRNA_102806 | hsa_circ_0008827 |
| ASCRP003119 | -2.85596   | 2.85596    | -1.5139758 | down | hsa_circRNA_102810 | hsa_circ_0056285 |
| ASCRP003171 | -2.1177953 | 2.1177953  | -1.0825631 | down | hsa_circRNA_102863 | hsa_circ_0057214 |
| ASCRP003193 | -3.1688948 | 3.1688948  | -1.6639798 | down | hsa_circRNA_102885 | hsa_circ_0007422 |
| ASCRP003256 | -2.6898692 | 2.6898692  | -1.427536  | down | hsa_circRNA_102949 | hsa_circ_0058792 |
| ASCRP003257 | -3.5309557 | 3.5309557  | -1.8200587 | down | hsa_circRNA_102950 | hsa_circ_0058794 |
| ASCRP003258 | -2.109809  | 2.109809   | -1.0771124 | down | hsa_circRNA_102951 | hsa_circ_0058805 |
| ASCRP003285 | -4.0304245 | 4.0304245  | -2.0109318 | down | hsa_circRNA_102978 | hsa_circ_0004525 |
| ASCRP003286 | -13.127688 | 13.1276884 | -3.714541  | down | hsa_circRNA_102979 | hsa_circ_0059151 |
| ASCRP003297 | -2.2957396 | 2.2957396  | -1.198959  | down | hsa_circRNA_102990 | hsa_circ_0059369 |
| ASCRP003298 | -2.2922593 | 2.2922593  | -1.1967702 | down | hsa_circRNA_102991 | hsa_circ_0006055 |
| ASCRP003387 | -2.319773  | 2.319773   | -1.2139836 | down | hsa_circRNA_103083 | hsa_circ_0060848 |
| ASCRP003412 | -9.6135381 | 9.6135381  | -3.2650675 | down | hsa_circRNA_103108 | hsa_circ_0061265 |
| ASCRP003418 | -2.3892707 | 2.3892707  | -1.2565703 | down | hsa_circRNA_103114 | hsa_circ_0003323 |
| ASCRP003428 | -2.0638191 | 2.0638191  | -1.0453165 | down | hsa_circRNA_103124 | hsa_circ_0001187 |
| ASCRP003437 | -2.6371091 | 2.6371091  | -1.3989572 | down | hsa_circRNA_103134 | hsa_circ_0061749 |
| ASCRP003440 | -2.623799  | 2.623799   | -1.3916572 | down | hsa_circRNA_103137 | hsa_circ_0061817 |
| ASCRP003473 | -2.2949932 | 2.2949932  | -1.1984899 | down | hsa_circRNA_103174 | hsa_circ_0062522 |
| ASCRP003492 | -2.4468056 | 2.4468056  | -1.2908995 | down | hsa_circRNA_103194 | hsa_circ_0062760 |
| ASCRP003495 | -2.5568317 | 2.5568317  | -1.3543572 | down | hsa_circRNA_103197 | hsa_circ_0002954 |
| ASCRP003509 | -3.1835125 | 3.1835125  | -1.6706194 | down | hsa_circRNA_103211 | hsa_circ_0063158 |
| ASCRP003523 | -7.1204458 | 7.1204458  | -2.8319676 | down | hsa_circRNA_103225 | hsa_circ_0063331 |
| ASCRP003568 | -3.4233497 | 3.4233497  | -1.7754087 | down | hsa_circRNA_103270 | hsa_circ_0064018 |
| ASCRP003577 | -2.9293041 | 2.9293041  | -1.550558  | down | hsa_circRNA_103279 | hsa_circ_0008027 |
| ASCRP003605 | -19.58141  | 19.5814107 | -4.2914128 | down | hsa_circRNA_103307 | hsa_circ_0064557 |
| ASCRP003653 | -2.1253267 | 2.1253267  | -1.0876846 | down | hsa_circRNA_103355 | hsa_circ_0065243 |
| ASCRP003659 | -28.503021 | 28.5030211 | -4.8330429 | down | hsa_circRNA_103361 | hsa_circ_0001296 |
| ASCRP003682 | -2.0974771 | 2.0974771  | -1.0686551 | down | hsa_circRNA_103384 | hsa_circ_0065898 |
| ASCRP003742 | -6.5104812 | 6.5104812  | -2.7027642 | down | hsa_circRNA_103444 | hsa_circ_0008797 |
| ASCRP003754 | -2.0194175 | 2.0194175  | -1.0139392 | down | hsa_circRNA_103456 | hsa_circ_0067127 |

|             |            |            |            |      |                    |                  |
|-------------|------------|------------|------------|------|--------------------|------------------|
| ASCRP003776 | -2.2158663 | 2.2158663  | -1.1478708 | down | hsa_circRNA_103478 | hsa_circ_0067492 |
| ASCRP003839 | -2.9987716 | 2.9987716  | -1.5843716 | down | hsa_circRNA_103541 | hsa_circ_0068462 |
| ASCRP003856 | -2.1794604 | 2.1794604  | -1.123971  | down | hsa_circRNA_103558 | hsa_circ_0068641 |
| ASCRP003897 | -2.0986733 | 2.0986733  | -1.0694776 | down | hsa_circRNA_103602 | hsa_circ_0069152 |
| ASCRP004014 | -2.3177256 | 2.3177256  | -1.2127098 | down | hsa_circRNA_103723 | hsa_circ_0070659 |
| ASCRP004021 | -7.193693  | 7.193693   | -2.8467326 | down | hsa_circRNA_103730 | hsa_circ_0005654 |
| ASCRP004040 | -2.5615802 | 2.5615802  | -1.357034  | down | hsa_circRNA_103749 | hsa_circ_0005480 |
| ASCRP004074 | -2.1704455 | 2.1704455  | -1.1179912 | down | hsa_circRNA_103784 | hsa_circ_0008903 |
| ASCRP004091 | -12.389073 | 12.3890739 | -3.6309964 | down | hsa_circRNA_103801 | hsa_circ_0071989 |
| ASCRP004108 | -9.4247661 | 9.4247661  | -3.2364568 | down | hsa_circRNA_103818 | hsa_circ_0072279 |
| ASCRP004170 | -3.1998767 | 3.1998767  | -1.6780163 | down | hsa_circRNA_103890 | hsa_circ_0007158 |
| ASCRP004181 | -2.0407304 | 2.0407304  | -1.0290856 | down | hsa_circRNA_103901 | hsa_circ_0004539 |
| ASCRP004196 | -2.3089114 | 2.3089114  | -1.2072128 | down | hsa_circRNA_103916 | hsa_circ_0005540 |
| ASCRP004224 | -6.7481584 | 6.7481584  | -2.7544938 | down | hsa_circRNA_103944 | hsa_circ_0005105 |
| ASCRP004292 | -3.1344699 | 3.1344699  | -1.6482215 | down | hsa_circRNA_104017 | hsa_circ_0004004 |
| ASCRP004315 | -10.876500 | 10.8765004 | -3.4431425 | down | hsa_circRNA_104040 | hsa_circ_0075410 |
| ASCRP004318 | -25.866360 | 25.8663605 | -4.6930052 | down | hsa_circRNA_104044 | hsa_circ_0075447 |
| ASCRP004324 | -2.0248507 | 2.0248507  | -1.0178155 | down | hsa_circRNA_104050 | hsa_circ_0075504 |
| ASCRP004365 | -2.1297862 | 2.1297862  | -1.0907086 | down | hsa_circRNA_104092 | hsa_circ_0076041 |
| ASCRP004372 | -4.7196459 | 4.7196459  | -2.2386786 | down | hsa_circRNA_104099 | hsa_circ_0076092 |
| ASCRP004391 | -2.3458404 | 2.3458404  | -1.2301049 | down | hsa_circRNA_104118 | hsa_circ_0003563 |
| ASCRP004394 | -2.3542025 | 2.3542025  | -1.2352384 | down | hsa_circRNA_104121 | hsa_circ_0076767 |
| ASCRP004399 | -2.6429312 | 2.6429312  | -1.4021389 | down | hsa_circRNA_104126 | hsa_circ_0076798 |
| ASCRP004408 | -5.6804578 | 5.6804578  | -2.5060072 | down | hsa_circRNA_104135 | hsa_circ_0007874 |
| ASCRP004421 | -4.189736  | 4.189736   | -2.0668593 | down | hsa_circRNA_104148 | hsa_circ_0008236 |
| ASCRP004434 | -2.2365311 | 2.2365311  | -1.1612628 | down | hsa_circRNA_104161 | hsa_circ_0077514 |
| ASCRP004466 | -4.5285163 | 4.5285163  | -2.1790385 | down | hsa_circRNA_104193 | hsa_circ_0077930 |
| ASCRP004467 | -3.4985892 | 3.4985892  | -1.8067733 | down | hsa_circRNA_104194 | hsa_circ_0004712 |
| ASCRP004495 | -15.195752 | 15.1957526 | -3.9255962 | down | hsa_circRNA_104223 | hsa_circ_0078277 |
| ASCRP004499 | -4.1100532 | 4.1100532  | -2.0391571 | down | hsa_circRNA_104227 | hsa_circ_0078297 |
| ASCRP004529 | -4.7329956 | 4.7329956  | -2.2427536 | down | hsa_circRNA_104258 | hsa_circ_0078605 |
| ASCRP004531 | -2.1026613 | 2.1026613  | -1.0722165 | down | hsa_circRNA_104260 | hsa_circ_0078610 |
| ASCRP004540 | -9.8493043 | 9.8493043  | -3.3000218 | down | hsa_circRNA_104270 | hsa_circ_0001666 |

|             |            |           |            |      |                    |                  |
|-------------|------------|-----------|------------|------|--------------------|------------------|
| ASCRP004553 | -2.0212562 | 2.0212562 | -1.0152522 | down | hsa_circRNA_104288 | hsa_circ_0079163 |
| ASCRP004574 | -2.4918191 | 2.4918191 | -1.3171993 | down | hsa_circRNA_104310 | hsa_circ_0079385 |
| ASCRP004578 | -2.5540806 | 2.5540806 | -1.352804  | down | hsa_circRNA_104315 | hsa_circ_0079480 |
| ASCRP004605 | -5.3411322 | 5.3411322 | -2.4171456 | down | hsa_circRNA_104342 | hsa_circ_0003162 |
| ASCRP004618 | -2.7682052 | 2.7682052 | -1.4689509 | down | hsa_circRNA_104356 | hsa_circ_0079996 |
| ASCRP004660 | -5.953838  | 5.953838  | -2.57382   | down | hsa_circRNA_104400 | hsa_circ_0006944 |
| ASCRP004661 | -8.1671944 | 8.1671944 | -3.0298406 | down | hsa_circRNA_104401 | hsa_circ_0005513 |
| ASCRP004672 | -2.038592  | 2.038592  | -1.0275731 | down | hsa_circRNA_104416 | hsa_circ_0080822 |
| ASCRP004728 | -2.6710991 | 2.6710991 | -1.4174335 | down | hsa_circRNA_104474 | hsa_circ_0082179 |
| ASCRP004749 | -7.1880188 | 7.1880188 | -2.8455942 | down | hsa_circRNA_104495 | hsa_circ_0001973 |
| ASCRP004822 | -2.6847024 | 2.6847024 | -1.4247622 | down | hsa_circRNA_104569 | hsa_circ_0083619 |
| ASCRP004825 | -3.5464109 | 3.5464109 | -1.8263597 | down | hsa_circRNA_104572 | hsa_circ_0007618 |
| ASCRP004837 | -2.4811653 | 2.4811653 | -1.3110179 | down | hsa_circRNA_104584 | hsa_circ_0083861 |
| ASCRP004848 | -9.729683  | 9.729683  | -3.2823928 | down | hsa_circRNA_104595 | hsa_circ_0008016 |
| ASCRP004905 | -2.431503  | 2.431503  | -1.2818483 | down | hsa_circRNA_104652 | hsa_circ_0084984 |
| ASCRP004919 | -2.8524606 | 2.8524606 | -1.512207  | down | hsa_circRNA_104666 | hsa_circ_0008496 |
| ASCRP004929 | -5.0927009 | 5.0927009 | -2.348431  | down | hsa_circRNA_104676 | hsa_circ_0008035 |
| ASCRP004946 | -4.8838623 | 4.8838623 | -2.2880225 | down | hsa_circRNA_104694 | hsa_circ_0007934 |
| ASCRP004955 | -4.7353436 | 4.7353436 | -2.2434691 | down | hsa_circRNA_104703 | hsa_circ_0008305 |
| ASCRP004962 | -4.0493803 | 4.0493803 | -2.0177011 | down | hsa_circRNA_104710 | hsa_circ_0006421 |
| ASCRP005005 | -5.4734861 | 5.4734861 | -2.45246   | down | hsa_circRNA_104755 | hsa_circ_0086686 |
| ASCRP005009 | -2.7832005 | 2.7832005 | -1.4767448 | down | hsa_circRNA_104759 | hsa_circ_0007367 |
| ASCRP005052 | -2.1981449 | 2.1981449 | -1.1362865 | down | hsa_circRNA_104803 | hsa_circ_0087354 |
| ASCRP005077 | -2.1231917 | 2.1231917 | -1.0862346 | down | hsa_circRNA_104829 | hsa_circ_0087565 |
| ASCRP005162 | -2.4599919 | 2.4599919 | -1.2986535 | down | hsa_circRNA_104915 | hsa_circ_0088485 |
| ASCRP005176 | -2.3381937 | 2.3381937 | -1.2253945 | down | hsa_circRNA_104929 | hsa_circ_0088807 |
| ASCRP005177 | -2.9440804 | 2.9440804 | -1.5578171 | down | hsa_circRNA_104930 | hsa_circ_0002675 |
| ASCRP005181 | -5.2670897 | 5.2670897 | -2.397006  | down | hsa_circRNA_104934 | hsa_circ_0007311 |
| ASCRP005233 | -2.2268475 | 2.2268475 | -1.1550027 | down | hsa_circRNA_104986 | hsa_circ_0090080 |
| ASCRP005260 | -3.6411897 | 3.6411897 | -1.8644099 | down | hsa_circRNA_105013 | hsa_circ_0001936 |
| ASCRP005301 | -2.1716185 | 2.1716185 | -1.1187707 | down | hsa_circRNA_400005 | hsa_circ_0092329 |
| ASCRP005305 | -2.2572514 | 2.2572514 | -1.1745671 | down | hsa_circRNA_400009 | hsa_circ_0092340 |
| ASCRP005308 | -2.2559061 | 2.2559061 | -1.173707  | down | hsa_circRNA_400012 | hsa_circ_0092339 |

|             |            |            |            |      |                    |                  |
|-------------|------------|------------|------------|------|--------------------|------------------|
| ASCRP005315 | -2.4516068 | 2.4516068  | -1.2937276 | down | hsa_circRNA_400019 | hsa_circ_0092342 |
| ASCRP005316 | -3.3445007 | 3.3445007  | -1.7417909 | down | hsa_circRNA_400020 | hsa_circ_0092372 |
| ASCRP005317 | -2.382044  | 2.382044   | -1.2522001 | down | hsa_circRNA_400021 | hsa_circ_0092306 |
| ASCRP005323 | -3.1445995 | 3.1445995  | -1.6528763 | down | hsa_circRNA_400027 | hsa_circ_0092367 |
| ASCRP005329 | -13.43710  | 13.4371059 | -3.7481505 | down | hsa_circRNA_400033 | hsa_circ_0092360 |
| ASCRP005386 | -2.8828515 | 2.8828515  | -1.5274965 | down | hsa_circRNA_400093 | hsa_circ_0092290 |
| ASCRP005388 | -6.3102236 | 6.3102236  | -2.6576911 | down | hsa_circRNA_400095 | hsa_circ_0092321 |

### Supplemental Table 2. circNOL10-sponged miRNA

| miRNA           |                 |                |                |
|-----------------|-----------------|----------------|----------------|
| hsa-miR-1       | hsa-miR-4259    | hsa-miR-29b    | hsa-miR-559    |
| hsa-miR-103     | hsa-miR-4263    | hsa-miR-29c    | hsa-miR-571    |
| hsa-miR-107     | hsa-miR-452     | hsa-miR-3132   | hsa-miR-584    |
| hsa-miR-1208    | hsa-miR-495     | hsa-miR-330-3p | hsa-miR-613    |
| hsa-miR-124     | hsa-miR-506     | hsa-miR-338-3p | hsa-miR-615-5p |
| hsa-miR-146b-3p | hsa-miR-513a-3p | hsa-miR-3664   | hsa-miR-634    |
| hsa-miR-149     | hsa-miR-524-3p  | hsa-miR-3673   | hsa-miR-760    |
| hsa-miR-1972    | hsa-miR-525-3p  | hsa-miR-3674   | hsa-miR-767-5p |
| hsa-miR-206     | hsa-miR-548g    | hsa-miR-380    | hsa-miR-877    |

### Supplemental Table 3. circNOL10-sponged miRNA pathways

| Pathway                        | p value     | Gene number | p value (-log10) | Gene rich   |
|--------------------------------|-------------|-------------|------------------|-------------|
| Focal adhesion                 | 2.70463E-38 | 105         | 37.56789198      | 0.527638191 |
| Wnt signaling pathway          | 2.12349E-33 | 84          | 32.67294937      | 0.575342466 |
| Ubiquitin mediated proteolysis | 3.28338E-27 | 71          | 26.48367898      | 0.518248175 |
| Insulin signaling pathway      | 7.90678E-26 | 70          | 25.10200013      | 0.510948905 |
| Adherens junction              | 2.42592E-21 | 43          | 20.61512353      | 0.597222222 |
| Mrna surveillance-pathway      | 1.89152E-20 | 51          | 19.72318906      | 0.56043956  |
| Mapk signaling pathway         | 4.2491E-20  | 122         | 19.37170315      | 0.413559322 |
| ErbB signaling pathway         | 5.04E-19    | 47          | 18.29756946      | 0.552941176 |
| Prostate-cancer                | 1.1E-18     | 49          | 17.95860731      | 0.505154639 |

|                                             |             |     |             |             |
|---------------------------------------------|-------------|-----|-------------|-------------|
| Pathways in cancer                          | 7.23633E-18 | 158 | 17.1404814  | 0.300380228 |
| Transcriptional misregulation in cancer     | 4.0355E-17  | 91  | 16.39410254 | 0.489247312 |
| Neurotrophin signaling pathway              | 6.26088E-17 | 60  | 16.20336462 | 0.504201681 |
| Pancreatic cancer                           | 1.58145E-16 | 40  | 15.80094453 | 0.533333333 |
| Regulation of actin cytoskeleton            | 3.20326E-16 | 100 | 15.49440808 | 0.469483568 |
| Adipocytokine-signaling pathway             | 1.85536E-15 | 38  | 14.73157228 | 0.550724638 |
| B cell receptor signaling pathway           | 4.24831E-15 | 39  | 14.37178431 | 0.549295775 |
| Melanoma                                    | 6.27556E-15 | 38  | 14.20234786 | 0.527777778 |
| RNA degradation                             | 8.87206E-15 | 38  | 14.05197548 | 0.481012658 |
| Colorectal cancer                           | 8.87206E-15 | 36  | 14.05197548 | 0.418604651 |
| Small cell lung cancer                      | 1.2231E-14  | 42  | 13.91253945 | 0.451612903 |
| Dopaminergic synapse                        | 1.65462E-14 | 64  | 13.78130068 | 0.488549618 |
| RNA transport                               | 4.17259E-14 | 72  | 13.37959481 | 0.421052632 |
| mTOR signaling pathway                      | 6.84041E-14 | 36  | 13.16491812 | 0.238410596 |
| Axon guidance                               | 7.40458E-14 | 64  | 13.13049939 | 0.365714286 |
| Protein processing in endoplasmic reticulum | 1.34E-12    | 79  | 11.8728952  | 0.478787879 |
| Endometrial cancer                          | 2.12E-12    | 31  | 11.67366414 | 0.534482759 |
| Gap junction                                | 5.82E-11    | 43  | 10.23507702 | 0.488636364 |
| Hedgehog signaling pathway                  | 1.62E-10    | 27  | 9.790484985 | 0.574468085 |
| Thyroid cancer                              | 1.41E-09    | 21  | 8.850780887 | 0.567567568 |
| Chronic myeloid leukemia                    | 2.37E-09    | 36  | 8.625251654 | 0.473684211 |
| Acute-myeloid leukemia                      | 2.71E-09    | 29  | 8.567030709 | 0.439393939 |
| Prion diseases                              | 5.77E-09    | 16  | 8.238824187 | 0.457142857 |
| Gnrh signaling pathway                      | 8.05E-09    | 42  | 8.09420412  | 0.451612903 |

---



## Detailed Experimental Section

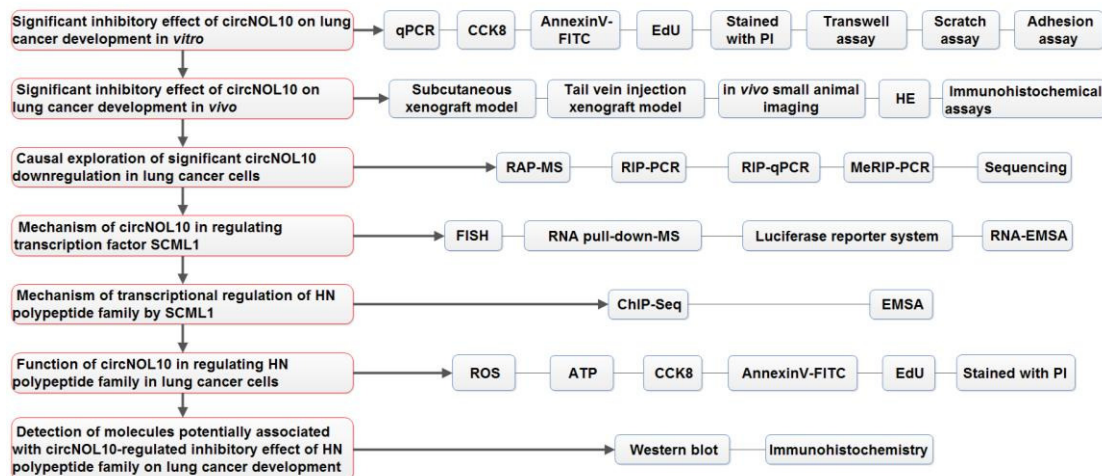

**Supplemental Figure 7. Schematic figure of the detailed experimental methods and flow chart.**

RNA Extraction, Reverse Transcription, and qPCR: Total RNA was extracted from cells and tissues using TRIzol reagent, according to the manufacturer's instructions (Ambion/Invitrogen Co., Carlsbad, CA, USA). The detailed procedures were as follows.  $1 \times 10^6$  cells were lysised with 1ml TRIzol reagent, add 200 $\mu$ l of chloroform per 1mL samples, followed by incubation for 10 min and centrifugation for 15 min at 12,000  $\times$ g at 4 $^{\circ}$ C. The aqueous phase containing the RNA was transferred to a new tube and 0.5 ml of isopropanol was added, followed by incubation for 10 min and centrifugation for 10 min at 12,000  $\times$ g at 4 $^{\circ}$ C. The pellet was resuspended in 1 ml of 75% ethanol. The sample was then briefly vortexed, centrifuged for 5 min at 7500  $\times$ g at 4 $^{\circ}$ C, and resuspended in 1 ml of absolute ethyl alcohol. The sample was briefly vortexed again and centrifuged for 7 min at 7500  $\times$ g at 4 $^{\circ}$ C. The RNA pellet was then air-dried for 10 min, resuspended in 20  $\mu$ l of RNase-free water, and incubated in a heat block at 58 $^{\circ}$ C for 10 min. The RNA concentration was then measured and the quality and concentration of the extracted RNAs were examined using a NanoDrop 1000 Spectrophotometer (NanoDrop Technologies, Wilmington, DE, USA). For quantification of circRNAs, RNase R (EpicentreBio, Madison, WI, USA) was added to digest linear RNAs during RNA extraction, using 3U RNase R enzyme per 1000 ng RNA and incubation for 10 min at 37 $^{\circ}$ C. RNAs (circRNA, mRNA, and pre-mRNA) were reverse transcribed into cDNAs using a Goscript<sup>TM</sup> Reverse Transcription System (Promega, Madison, WI, USA) as follows. Nuclease-free water was added to

1000 ng RNA and 1  $\mu$ l random primer to a volume of 10  $\mu$ l and mixed well. The mixture was then thermally denatured for 5 min at 70°C. Nuclease-free water 1.5  $\mu$ l, 5 $\times$  Reaction Buffer 4  $\mu$ l, MgCl<sub>2</sub> 2  $\mu$ l, PCR Nucleotide Mix 1  $\mu$ l, reverse transcriptase 1  $\mu$ l, and ribonuclease inhibitor 0.5  $\mu$ l were added to a final volume of 20  $\mu$ l and mixed well to anneal for 5 min at 25°C, followed by extension for 60 min at 42°C, inactivation for 15 min at 70°C, and chilling at 4°C. qPCR was carried out using GoTaq<sup>®</sup> qPCR Master Mix (Promega). GAPDH was used as an internal reference gene. Relative expression levels of the genes were determined using the  $2^{-\Delta\Delta C_t}$  method, as follows. Nuclease-free water 7  $\mu$ l, forward primer 0.4  $\mu$ l, reverse primer 0.4  $\mu$ l, GoTaq qPCR Master Mix 10  $\mu$ l, CXR 0.2  $\mu$ l, and cDNA 2  $\mu$ l were mixed well, Select SYBR as the detection dye for the entire plate. Hot-start activation was carried out for 2 min at 95°C for one cycle, followed by denaturation for 15 s at 95°C and extension for 60 s at 60°C for 40 cycles.

**Cell Culture and Human Tissue Sample Collection:** The cells used in this study were all cultured in strict accordance with the cell culture conditions and methods recommended by the American Type Culture Collection (<https://www.atcc.org>). BEAS-2B cells were cultured in serum-free BEGM (Lonza/Clonetics Co, Kit Catalog No. CC-3170, Walkersville, MD, USA). H460 cells were cultured in RPMI-1640 (Hyclone, Logan, Australia) and A549 cells in F12K (ThermoFisher Scientific, Carlsbad, CA, USA), both supplemented with 10% fetal bovine serum (Every Green, Hangzhou, China). The cells were cultured at 37°C and 5% CO<sub>2</sub> under saturated humidity. Human tissue samples were provided by the tissue bank of the Institute of Chemical Carcinogenesis of Guangzhou Medical University and were derived from individuals recruited from Guangzhou City. Informed consent was obtained from all patients before sample collection. This study was approved by the Medical Ethics Committee of Guangzhou Medical University.

**Expression Vectors:** The circNOL10 overexpression vector used for transient transfection was pcircRNA1.1 (BersinBio, Guangzhou, China) and the vector used for stable transfection was pLV-circRNA1.1 (BersinBio). The eukaryotic protein expression vector was pcDNA3.1 (Invitrogen, ThermoFisher Scientific, Carlsbad, CA, USA) and the prokaryotic protein expression vector was pGEX-6P-1 (GE Healthcare,

Boston, MA, USA). The luciferase reporter vector was psiCHECK™-2 Vector (Promega).

**Gene Silencing and Overexpression:** Transient siRNA transfection was used for in vitro functional studies. siRNAs targeting circRNA and mRNA were designed and synthesized and their specificities tested. In this study, three siRNAs were designed for each gene, and the two with the higher silencing efficiencies were chosen for subsequent experiments. The transfection reagent used in the silencing experiments was Ribo FECT™ CP Transfection Kit (166T) (RiboBio, Guangzhou, China). Overexpression vectors were constructed for targeting genes (circRNA and mRNA). Stable transfection was used for in vivo studies. A specific lentiviral vector was constructed and packaged. The transfection reagent used in the overexpression experiments was EndoFectin-Lenti (GeneCopoeia, Rockville, MD, USA). All the experiments were conducted in strict accordance with the relevant manufacturer's instructions. The eukaryotic protein expression vector used in this study was pcDNA3.1 (Invitrogen), the prokaryotic protein expression vector was pGEX-6P-1 (GE Healthcare, Boston, MA, USA), and the luciferase reporter vector was psiCHECK™-2 Vector (Promega).

**Cell Viability Detected using the CCK8 Assay:** Cell viability was detected using a Cell Counting Kit-8 (Beyotime Biotechnology, Shanghai, China). Cells in logarithmic phase were collected and seeded into 96-well plates, with 2000 cells/100 µl well. The cells were cultured in 5% CO<sub>2</sub> at 37°C overnight followed by gene silencing or overexpression treatment. The medium was replaced with fresh medium 6 h after transfection, and 10 µl of CCK8 solution was added to each well after 48 h of transfection, followed by incubation for a further 1–4 h. The absorbance of each well was measured at 450 nm using a microplate reader (BioTex, Houston, TX, USA). The reaction was terminated according to the absorbance value.

**Apoptosis Detected with Flow Cytometry (FCM):** Apoptosis was detected using an Annexin V-fluorescein isothiocyanate (FITC) apoptosis detection kit (KeyGen Biotech, Nanjing, China). A total of  $5 \times 10^5$  cells were collected from each sample 48 h after transfection and resuspended in 100 µl of  $1 \times$  Binding Buffer, followed by the

addition of 5  $\mu$ l Annexin V-FITC and 5  $\mu$ l propidium iodide staining solution and mixing. The reaction was carried out for 10 min in the dark at room temperature, and 400  $\mu$ l 1 $\times$ Binding Buffer was then added and mixed evenly. The cells were detected within 1 h using a Guava® easyCyte flow cytometry system (Millipore, Billerica, MA, USA).

**Cell Proliferation Detected using the EdU Assay:** The EdU assay was carried out using a Cell-Light™ EdU Apollo® 567 In Vitro Imaging Kit (RiboBio, Guangzhou, China). Cells were seeded into 12-well plates, and EdU solution (Reagent A) was diluted with cell culture medium at a ratio of 2500:1, and then added into the plate. The cells were cultured at 37°C in 5% CO<sub>2</sub> for 24 h, the medium was then discarded, and the cells were washed twice with phosphate-buffered saline (PBS) for 5 min each and then fixed with 4% paraformaldehyde for 30 min at room temperature. The fix solution was then discarded and the cells were washed with 2 mg/ml glycine solution for 5 min followed by PBS for 5 min, and then washed with 0.5% TritonX-100/PBS for 10 min followed by PBS for 5 min. The 1 $\times$  Apollo staining reaction solution was prepared, added into the wells, and incubated for 30 min in the dark at room temperature. The staining solution was then removed and the cells were washed twice in 0.5 TritonX-100/PBS for 10 min each, followed by methanol for 5 min and PBS for 5 min. The 1x Hoechst33342 reaction solution was prepared by diluting the kit F reagent with deionized water at a ratio of 100:1, adding it into the wells, and incubating for 30 min in the dark at room temperature. The reaction solution was then removed and the cells were washed three times with PBS for 5 min each and then observed and imaged using an inverted fluorescence microscope (DMI3000 B, Leica, Wetzlar, Germany).

**Cell Cycle Detected with FCM:** Cell cycle analysis was performed using a Cell Cycle Detection kit (KeyGen Biotech). At 48 h after transfection,  $5 \times 10^5$  cells were collected from each sample, added into 2 ml centrifuge tubes, and washed three times with 1 $\times$  precooled PBS. After centrifugation, the cell pellets were collected and the supernatants were discarded. The cells were resuspended in 0.1 ml 1 $\times$  PBS and rapidly added into 1.9 ml 75% precooled ethanol and mixed well by pipetting. The cells were then stored at -20°C overnight. The ethanol-fixed cells were centrifuged

and the supernatants were discarded. The cells were washed three times with 1× PBS to remove residual ethanol, resuspended in 0.1 ml solution containing 0.1 mg/ml RNase A, and incubated at 37°C in a water bath for 15 min, followed by the addition of 0.4 ml propidium iodide and incubation at room temperature for 10 min. Cell cycle was detected using a Guava® easyCyte flow cytometry system (Millipore).

**Cell Invasion Detected using the Transwell Migration Assay:** The transwell chambers (BD, Corning, NY, USA) were coated with extracellular matrix and hydrated in serum-free medium overnight. Transfected cells were digested with trypsin to prepare a cell suspension, counted, and adjusted to  $1.2 \times 10^4$ /ml. Medium containing 15% fetal bovine serum (700 µl) was added into the lower chamber and the upper chamber was placed gently on top of the lower chamber, avoiding air bubbles, then 200 µl of cell suspension was added into the upper chamber and incubated for 24 h. After incubation, the upper chamber was removed and placed in a clean 24-well plate and washed three times with PBS three times, followed by the addition of 200 µl 100% methanol for 15 min to fix the cells. The methanol was discarded and 200 µl of crystal violet was added for 15 min to stain the cells. The crystal violet was then discarded and the cells were washed twice with PBS. Unmigrated cells were removed using a cotton swab and migrated cells were observed and photographed under a light microscope.

**Cell Migration Detected using the Scratch Assay:** Reference lines were drawn across the wells on the outer bottom of a six-well plate using a marker pen. After 48 h of transfection,  $1 \times 10^6$  cells were then seeded into each well and incubated overnight. Scratches were made perpendicular to the reference lines using a pipette tip. The cells were washed three times with PBS to remove loose cells, followed by the addition of serum-free medium and incubation at 37°C in 5% CO<sub>2</sub> for 24 h. The cells were then observed and photographed under a light microscope.

**Cell Adhesion Test:** Plates were pre-plated with 10 µg/ml fibronectin (FN) (BD, Corning) 70 µl/well at 4°C overnight, washed three times with PBS, and then blocked with 1% BSA (Solarbio, Beijing, China) at 37°C for 1 h. The transfected cells were digested and suspended in serum-free medium. The cell concentration was adjusted to

$5 \times 10^5$ /ml and the cells were seeded into the FN pre-spread 96-well plates. Each well contained ~5000 cells and three replicate wells were set up for each group. Cells were incubated for 1 h at 37°C, and non-adherent cells were then washed off with PBS. CCK8 solution 10  $\mu$ l was added into each well and incubated for 1–4 h, after which the cell culture was terminated and the viability of the adherent cells was tested to reflect their adhesion ability.

**Construction of Lung Cancer Xenograft Models in Nude Mice:** We constructed a subcutaneous xenograft model and a tail vein injection xenograft model in nude mice. This study was approved by the Animal Experiment Ethics Committee of Guangzhou Medical University. All mice were kept in a specific-pathogen-free animal room in the Experimental Animal Center of Guangzhou Medical University. To create the nude mouse subcutaneous xenograft model, female BALB/c-nu/nu mice were purchased from Guangdong Medical Laboratory Animal Center. H460 cells (circNOL10 stably overexpressed, green fluorescent protein-labeled) were washed with PBS and adjusted to a final cell concentration of  $5 \times 10^6$ /0.1 ml. The mice were then inoculated subcutaneously with 0.1 ml of cell solution into the right axillary region. Pressure was applied to the injection site using an alcohol-soaked cotton ball for a few seconds. All operations were finished within 30 min after harvesting cells and strictly followed aseptic principles. For the tail vein injection xenograft model, mice and cell types were obtained as mentioned above. Cells were adjusted to  $1 \times 10^7$ /0.1 ml and 0.1 ml was injected into the tail vein of the model mice. After cell injection, bioluminescence imaging was performed using an in vivo small animal imaging system (Night OWL II LB983 NC100, Berthold Technologies, Stuttgart, Germany) at 1, 3, 5, 7, 14, and 21 days. After imaging, all mice continued to be fed until 21 days after inoculation and were then killed humanely.

**Immunohistochemistry:** Tissue samples were fixed, dehydrated through graded ethanols, paraffin-embedded, sectioned, dried, and baked. For immunohistochemical staining, sections were treated sequentially with xylenes I–III for 15 min each, followed by, absolute ethanols I–II for 5 min each, 85% alcohol and 75% alcohol for 5 min each, and then washed with distilled water. The tissue sections were placed in a repair box filled with citrate antigen repair buffer (pH 6.0) followed by heating in a

pressure cooker with a certain amount of water. Heating was stopped when water vapor began to escape, and the pressure was then released. The sections were then placed in the repair box, being careful to avoid excessive evaporation of the buffer. The sections were allowed to cool naturally, and washed three times with PBS on a decolorizing shaker, for 5 min each. The sections were then placed in 3% H<sub>2</sub>O<sub>2</sub> solution, incubated at room temperature for 25 min in a dark environment, washed three times with PBS for 5 min each, covered evenly with 3% BSA, and then blocked at room temperature for 30 min. The blocking solution was removed gently and primary antibody solution in PBS was dropped onto the sections and incubated in a humid chamber at 4°C overnight. The sections were then washed three times with PBS on a decolorizing shaker for 5 min each, followed by incubation with horseradish peroxidase-labeled secondary antibody solution (from the same species as the primary antibody) at room temperature for 50 min followed by three washes with PBS for 5 min each. Freshly-prepared diaminobenzidine (DAB) staining solution was then dropped onto the samples and the staining time was controlled by observing the sections under a microscope. Positive staining was indicated by brown-yellow color. The sections were then washed in running distilled water to terminate the reaction, counter-stained with hematoxylin for 3 min, and washed again with running water. The sections were immersed in 1% hydrochloric acid alcohol for several seconds and then washed again with running water. Ammonia water was used to blue the hematoxylin. Sections were then dehydrated by sequential treatment with 75% alcohol, 85% alcohol, absolute ethanol I, absolute ethanol, and xylene for 5 min each. The sections were dried and mounted with neutral gum and observed and photographed under a light microscope.

**Hematoxylin–Eosin Staining:** Sample preparation and sectioning were performed as above. The sections were treated sequentially with xylene I and xylene II for 20 min each, absolute ethanol I and absolute ethanol II for 10 min each, and 95%, 90%, 80%, and 70% alcohol for 5 min each, and then washed with distilled water. The sections were immersed in hematoxylin for 5 min, washed with running water, and then treated with 1% hydrochloric acid alcohol for several seconds, followed by washing with running water, bluing in aqueous 0.6% ammonia solution, and washing with running water. The sections were then stained with eosin solution for 1 min and

dehydrated by sequential treatment with 95% alcohol I, 95% alcohol II, absolute ethanol I, absolute ethanol II, and xylene for 5 min each. The sections were then dried and mounted with neutral gel, and observed and photographed under a light microscope.

**RNA Antisense Purification (RAP) and Mass Spectrometry (MS):** RAP was performed using a RAP kit (BersinBio, Guangzhou, China) according to the manufacturer's instructions. The main steps of the experiment included cross-linking cells, collecting cell pellets, homogenization, removal of the DNA, preparation of the probe, preparation of the beads, hybridization and capture, protein elution, protein precipitation, protein dissolution, and quality control analysis. The obtained proteins were then used for western blot or MS. MS was performed in accordance with standard procedures using a Q Exactive mass spectrometer (ThermoFisher Scientific). The proteins were first digested to produce peptide fragments, and the fragments were then dissolved, vortexed thoroughly, and centrifuged at 16,363 g at 4°C for 10 min. The supernatants were transferred to a loading tube for MS identification.

**Western Blot:** Proteins were extracted using a total protein extraction kit (KeyGen Biotech), according to the manufacturer's instructions, and the extracted proteins were quantified. For electrophoresis, the concentrations of the loaded protein samples were adjusted to the same level. The loading samples were prepared by mixing with ×5 loading buffer ( $\beta$ -mercaptoethanol was added) at a ratio of 4:1 and the proteins were denatured at 100°C for 5 min and then stored at -80°C. The proteins were then loaded onto a discontinuous sodium dodecyl sulfate-polyacrylamide gel at 40–60  $\mu$ g/well and subjected to electrophoresis at 100 V, followed by 120 V when the samples reached the separation gel. A marker with a molecular weight of 16–220 kD was included in the gel. The proteins were transferred to a polyvinylidene difluoride membrane (Millipore) using a wet-transfer device (Bio-Rad, CA, USA) under 200 mA constant current flow, for a time adjusted according to the molecular weight of the target proteins. After transfer, the membrane was rinsed with TBST for 1–2 min and blocked with 5% skimmed milk for 60 min. The membrane was then cut appropriately as determined by the marker. Primary antibody was diluted according to the instructions, and the membrane was placed in the primary antibody solution at 4°C overnight,



followed by three washes with TBST for 15 min each. Secondary antibody was also diluted according to the kit instructions and incubated with the membrane for 1 h, followed by three washes with TBST for 15 min each. Finally, the membrane was stained using BeyoECL Plus chemiluminescence reagents.

**RNA Immunoprecipitation (RIP):** Cells were lysed and sonicated, followed by removal of DNA and balance protein A/G, and divided into three groups of 0.8 ml each: Input samples were stored at  $-20^{\circ}\text{C}$  until needed; immunoprecipitation (IP) and IgG samples were added to the test antibodies or same amount of IgG (negative control antibody) and incubated in a vertical mixer at  $4^{\circ}\text{C}$  for 16 h overnight, followed by the addition of 20  $\mu\text{l}$  of protein A/G beads, and incubation in a vertical mixer at  $4^{\circ}\text{C}$  for 1 h. The magnetic beads were collected and the supernatants were discarded, and 0.5 ml of polysome washing buffer 1 and 5  $\mu\text{l}$  of dithiothreitol (DTT) were added to the IP and IgG samples, respectively, followed by washing three times. The magnetic beads were then collected and the supernatant was removed, and 94.5  $\mu\text{l}$  of polysome washing buffer 1, 0.5  $\mu\text{l}$  of DNase salt stock, and 5  $\mu\text{l}$  of DNase (5 U) were added to the IP and IgG samples, respectively, and incubated for 5 min at  $37^{\circ}\text{C}$ . The magnetic beads were then collected and the supernatant was removed, and the IP and IgG samples were washed with 0.5 ml of polysome washing buffer 2 and 5  $\mu\text{l}$  DTT, and incubated for 5 min at  $4^{\circ}\text{C}$ . The magnetic beads were collected and the supernatant was removed, and 100  $\mu\text{l}$  polysome elution buffer was added, and the beads were then resuspended in 1  $\mu\text{l}$  DTT and 1  $\mu\text{l}$  proteinase K. One microliter of DTT and 2  $\mu\text{l}$  proteinase K were added to the input samples and incubated at  $55^{\circ}\text{C}$  for 1 h. The RNAs were eluted and the magnetic beads were collected, and the supernatant was transferred to a clean RNase-free centrifuge tube. RNAs were extracted and subjected to reverse transcription, PCR, and qPCR experiments.

**Methylated RNA Immunoprecipitation (MeRIP):** MeRIP was performed using a MeRIP kit (BersinBio). First, total RNAs were extracted and 10  $\mu\text{l}$  RNA samples were used as the input samples, and stored at  $-80^{\circ}\text{C}$  until use. For IP, m6A-specific antibody, 200  $\mu\text{l}$  1 $\times$ IP buffer and 2  $\mu\text{l}$  RNase inhibitor was added to the remaining RNA samples and incubated in a vertical mixer at  $4^{\circ}\text{C}$  for 2–4 h. The protein A/G beads were prepared by washing 30  $\mu\text{l}$  beads for each MeRIP sample twice with 1 ml

1× IP buffer, followed by 100 µl 1× IP buffer (containing 0.5 mg/ml BSA) to block the protein A/G beads at 4°C for 2 h. The blocked beads were then washed twice with 100 µl 1× IP buffer. Protein A/G binding to the antibody was performed by incubating the prepared protein A/G beads with the sample–antibody hybrid solution in a vertical mixer at 4°C for 2–4 h, washing three times with 500 µl 1× IP buffer, and incubation with 200 µl 1× IP buffer (plus 1 µl proteinase K) at 50°C for 45 min, with mixing every 10 min. RNAs were extracted and subjected to reverse transcription, PCR, and qPCR experiments.

**RNA-Fluorescence in Situ Hybridization (FISH):** The cells were seeded on coverslips in 12-well plates and cultured for 24 h to achieve 70% confluence. The medium was discarded, and the cells were washed twice with PBS for 5 min each. The cells were then fixed with 4% paraformaldehyde at room temperature for 30 min, the fixing solution was discarded, and the cells were washed twice with PBS for 5 min each. The cells were digested with 20 µg/ml proteinase K (Sangon Biotech, Shanghai, China) at 37°C for 5 min, washed briefly with PBS, fixed with 1% paraformaldehyde at room temperature for 10 min, and then washed twice with PBS for 5 min each. The cell coverslips were then washed sequentially with 70%, 85%, and 100% ethanol for 3 min each. The prepared 6-FAM-labeled fluorescent probes (Sangon Biotech) were dropped onto the coverslips and denatured for 3 min at 73°C, followed by transferring the coverslips to the dark at 37°C and incubating for 16 h. The next day, the cells were washed with washing solution 1 (50% formamide/2× SSC) at 43°C for 5 min, followed by washing solution 2 (0.1 Triton X-100/2× SSC) at 37°C for 5 min, and finally, 2× SSC at room temperature for 5 min. Nuclei were counterstained with 4',6-diamidino-2-phenylindole (DAPI) and the cells were washed with PBS. The coverslips were removed from the 12-well plates, air-dried, and mounted with anti-fluorescence attenuation agent. The cells were then observed and photographed using a laser confocal microscope.

**RNA Pull-down:** RNA pull-down experiments were carried out using an RNA pull-down kit (BersinBio). Full-length and truncated biotinylated RNA pull-down probes were designed and synthesized, and the experiments were conducted in strict accordance with the instructions of the kit manufacturer. The main steps included

formation of RNA secondary structure, preparation of probe–magnetic bead complex, extraction of total proteins, removal of nucleic acids from protein samples and pre-washing, acquisition of RNA-binding proteins by RNA pull-down, collection of RNA-binding proteins, protein denaturation, and analysis of the obtained proteins. The acquisition and collection of RNA-binding proteins were core steps. Protein acquisition by RNA pull-down was achieved as follows: cell extracts were mixed with the probe–magnetic bead complex followed by the addition of 0.5 ml RIP buffer, 5  $\mu$ l protease inhibitor cocktail, 5  $\mu$ l DTT, 5  $\mu$ l RNase inhibitor, and 5  $\mu$ l poly(dI.dC), and then allowed to bind with gentle rotation at 25°C for 2 h. After standing for 1 min, the magnetic beads were collected and the supernatants were discarded, and 1 ml pre-cooled NT2 buffer was added and mixed fully at 4°C for 5 min. The samples were then placed on a magnetic stand for 1 min to collect the magnetic beads, the supernatant was discarded, and the magnetic beads were washed four times. RNA-binding proteins were collected as follows: 30  $\mu$ l of urea CHAPS buffer and 0.3  $\mu$ l of DTT were added to the magnetic bead solution in the RNA-pull-down and negative control groups, and then eluted by incubation at 37°C for 2 h. The magnetic beads were collected as described above and the supernatants were transferred to clean centrifuge tubes. The elution was repeated several times and the obtained proteins were stored at –80°C for future use.

**Immunocytochemistry:** The cells were seeded on coverslips in 12-well plates and cultured for 24 h to achieve 70% confluence. The culture medium was discarded and the cells were washed twice with PBS for 5 min each, and then fixed with 4% paraformaldehyde for 30 min at room temperature. The fixation solution was discarded and the cells were washed with PBS. The coverslips were immersed in 0.6% H<sub>2</sub>O<sub>2</sub>/methanol mixture at room temperature for 30 min to inactivate endogenous peroxidase, and then washed twice with distilled water for 5 min each. Blocking solution (5% BSA) was dropped onto the samples at room temperature for 20 min and then discarded. Anti-SCML1 primary antibody (H00006322-D01, Abnova, Taipei, Taiwan) working solution was then dropped onto the samples and incubated at 4°C overnight. The cells were washed five times with PBS for 5 min each, and biotinylated goat anti-rabbit IgG secondary antibody (BA1003, Boster, Wuhan, China) working solution was then dropped onto the cells and incubated at 37°C for 30 min.

The cells were washed three times with PBS for 5 min each, followed by streptavidin–biotin complex at 37°C for 30 min. After four washes with PBS for 5 min each, DAB solution (AR1022, Boster) was added at room temperature for staining. The staining time was controlled by microscopic observation and was terminated when the cells developed a brown-yellow color. The cells were washed twice with distilled water and the nucleus was counterstained with hematoxylin. The hematoxylin was then removed and the cells were washed with distilled water until the hematoxylin solution had been totally removed. The coverslips were then dried and mounted with neutral gel, and the cells were observed and photographed under a light microscope (Eclipse 80i, Nikon, Tokyo, Japan).

**Electrophoretic Mobility Shift Assay (EMSA):** An SCML1 prokaryotic expression vector was constructed for RNA-EMSA. Proteins were expressed and nuclear proteins were extracted and purified. The wild-type probe was biotin-labeled but the other probes were not labeled. The reaction systems were prepared according to the specific experiments. After completion of the binding reaction, the mixture was left to stand at room temperature for 20 min and a 6.5% non-denaturing polyacrylamide gel was prepared. The samples were mixed with EMSA/gel-shift loading buffer and subjected to electrophoresis at 10 V/cm. Electrophoresis was terminated when the bromophenol blue band reached the lower quarter of the gel. The gel was transferred to a PDVF membrane using a wet electrotransfer device with 0.5× Tris-Borate-EDTA for 60 min at 4°C and 380 mA (about 100 V). UV cross-linking was then performed for 45–60 s at a wavelength of 254 nm and 120 mJ/cm<sup>2</sup>. After thorough blocking and washing, a chemiluminescent reaction was performed using BeyoECL Plus reagent for 3 min at room temperature, followed by routine X-radiography.

**Co-immunoprecipitation:** Cell lysates and supernatants were collected and a portion of the cell lysate was used as the input sample. The remaining supernatants were placed in clean centrifugal tubes as the IP sample. A/G beads (200 µl) were washed with pre-cooled PBS and then divided into an IP-target antibody group (160 µl plus 2 µg target antibody and 2 ml PBS) and an IP-IgG group (80 µl plus 1 µg IgG antibody and 1 ml PBS), and incubated for 2–4 h at 4°C. The cells were then centrifuged at 4000 × g at 4°C for 1 min, and the supernatants were discarded. The beads were

washed three times. The pre-prepared cell extracts were then added to the IP-target antibody and IP-IgG groups and incubated overnight at 4°C, followed by the addition of protease inhibitors and phenylmethylsulfonyl fluoride, and centrifugation at 4000 × g at 4°C for 1 min. The beads were then washed three times with pre-cooled PBS. The IP-target antibody group was divided into an IP group and MS group at a ratio of 1:4. Loading buffer was added to the Input, IP, and IgG groups and boiled for 10 min. CHAPS lysate was then added to the MS group and shaken for 30 min, and the supernatants were collected. The lysis procedure was repeated and the cells were then collected. The samples were stored at –20°C for MS detection and silver staining.

**Chromatin IP (ChIP):** The cells were first cross-linked and sonicated. For IP, lysed positive control, negative control, and experimental samples were prepared and 900 µl of dilution buffer containing protease inhibitor was added to each tube (100 µl), followed by 60 µl protein A/G agarose (50% suspension) and gentle shaking in a water bath at 4°C for 1 h. The agarose beads were then separated using centrifugation at 3000–5000 × g at 4°C for 1 min, and 100 µl of the supernatants were collected and stored at 4°C as the input sample. The remaining supernatants were placed in clean EP tubes and 1 µg anti-RNA polymerase, 1 µg normal mouse IgG, and 1 µg specific antibody were added to the positive control, negative control, and experimental groups, respectively. After gentle shaking at 4°C overnight, 60 µl of protein A/G agarose was added and incubated at 4°C for 1 h. The agarose beads were then precipitated by centrifugation at 3000–5000 × g at 4°C for 1 min and the supernatants were removed. The DNA-protein complexes were then eluted, de-cross-linked, and the DNAs were purified.

**Chromatin Isolation by RNA Purification (ChIRP):** ChIRP was performed using a ChIRP kit (BersinBio). ChIRP probes and probe sets targeting the investigated genes were designed, synthesized, and biotin-labeled. Cells were harvested, cross-linked, pelleted, lysed, and sonicated, and 1 ml of cell lysate was then subjected to ChIRP. Each sample was transferred into two tubes (0.5 ml per tube) labeled ‘ChIRP odd’ and ‘ChIRP even’, respectively, and 1 ml of hybridization buffer was added to each tube. The prepared odd and even probes were added to the corresponding tubes and hybridized with the cell lysates in a vertical mixer, as follows: denaturing at 65°C for

10 min, hybridization at 25°C for 30 min, denaturing at 50°C for 5 min, and hybridization at 25°C for 90 min. The prepared magnetic beads were added to the hybridization system (2/5 the volume added to normal control group compared with the ChIRP group) and mixed, and binding was carried out at 25°C for 60 min. The magnetic beads were collected and supernatants were discarded, and 1 ml of pre-warmed wash buffer was then mixed with the magnetic beads at 25°C for 5 min. The magnetic beads were collected and supernatants were discarded. The procedure was repeated four times and the DNAs were isolated.

**Subcellular Localization of HN Peptides Detected by MitoTracker Staining in Combination with an Immunofluorescence Assay:** Cells were seeded on coverslips in 12-well plates and cultured for 24 h to 70% confluence. The medium was discarded and 37°C pre-warmed medium containing MitoTracker® probe (M7512, Invitrogen) was added and staining was carried out by incubation at 37°C and 5% CO<sub>2</sub>. The cells were then washed with fresh 37°C pre-warmed medium, and the medium was replaced with growth medium containing 3.7% formaldehyde at 37°C for 15 min to fix the cells. The fixation solution was discarded and the cells were washed twice with PBS for 5 min each. Nuclei were counterstained with DAPI (AR1176, Boster) and the cells were then washed with PBS. Finally, the coverslips were removed from the 12-well plates, air-dried, sealed with anti-fluorescein attenuating sealant (AR1109, Boster), and photographed with a laser confocal microscope (SP8, Leica, Solms, Germany).

**Detection of Reactive Oxygen Species (ROS):** ROS detection was performed after cell transfection using a ROS detection kit (Beyotime), according to the manufacturer's instructions. The concentration of the detected cells was adjusted to  $5 \times 10^5$ /ml. The working solution was prepared by mixing 2',7'-dichlorodihydrofluorescein diacetate (DCFH-DA) and serum-free DMEM at a ratio of 1:1000 to give a final concentration of 10 µmol/l. The original medium was removed and the cells were washed twice with serum-free medium, followed by adding 1 ml DCFH-DA working solution and mixing. The cells were incubated for 20 min at 37°C and then pelleted by centrifugation at 94 g at 4°C for 3–4 min. The supernatants were discarded and the cells were washed two or three times with serum-free DMEM and then resuspended

in 0.5 ml of serum-free DMEM medium and analyzed using FCM (Millipore).

Detection of Mitochondrial Membrane Potential (MMP) using the JC-1 Assay: MMP was detected using a JC-1 MMP Assay Kit (Beyotime) after cell transfection, according to the manufacturer's instructions. The tested cells were adjusted to  $5 \times 10^5$ /ml. The working solution was prepared by diluting an appropriate amount of JC-1 (200 $\times$ ) with 8 ml ultrapure water per 50  $\mu$ l of JC-1 (200 $\times$ ). JC-1 was fully dissolved and mixed by vortexing, and 2 ml JC-1 staining buffer (5 $\times$ ) was then added and mixed to give the JC-1 working solution. One milliliter of the working solution was then added to the cell suspension and inverted several times to mix, and then incubated at 37°C for 20 min. An appropriate amount of JC-1 staining buffer (1 $\times$ ) was prepared by adding 4 ml of distilled water per 1 ml of JC-1 staining buffer (5 $\times$ ) and placed in an ice bath. After incubation of the cells at 37°C, they were pelleted by centrifugation at 600  $\times$  g at 4°C for 3–4 min. The supernatants were discarded, and the cell pellet was washed twice with JC-1 staining buffer (1 $\times$ ) and resuspended in 1 ml of JC-1 staining buffer (1 $\times$ ). The procedure was repeated twice and the cells were resuspended in JC-1 staining buffer (1 $\times$ ) and analyzed with FCM (Millipore).

Detection of Adenosine 5'-triphosphate (ATP): ATP levels were measured using an enhanced ATP assay kit (Beyotime). After transfection for 48 h, 200  $\mu$ l ATP detection lysis buffer was added to each well of a six-well plate and the cells were lysed fully by repeatedly pipetting or shaking the plate, followed by centrifugation at 12,000  $\times$  g at 4°C for 5 min. The supernatant was collected for subsequent use. The ATP-detection working solution was prepared by diluting the ATP-detection reagent with specific dilution buffer at a ratio of 1:5 (v/v). One hundred microliters of the working solution was then added to the detection wells for 3–5 min at room temperature, followed by 20  $\mu$ l of the samples, and mixed quickly. Relative light unit (RLU) values were measured using a luminometer (BioTex).

Antibodies: The following antibodies were used: MLH3, P-p53, CHEK2, P-CHEK2, CDC25A, Rb, P-Rb, and P-E2F1 (Affinity, Cincinnati, OH, USA); SCML1 (Abnova, Taipei, China); ESRP1 (Proteintech, Chicago, IL, USA); Bax, Bcl-2, caspase-9, E-cadherin, PCNA, PTEN, CCND1, CDK2, E2F1, MSH2, p53, POLE, P-CDC25A,

LIG4, m6a, and ubiquitin (Abcam, Cambridge, UK).

Primers, Probes, and siRNAs Used in This Study:

| Gene          | Primer(sense)         | Primer(anti-sense)       |
|---------------|-----------------------|--------------------------|
| circNOL10     | CAACTCAGGCATGCTTCTGA  | TATGGTTCCTGTGGCAAACA     |
| Pre-NOL10     | TCCTGCCCTTGGAAAACAGA  | CAGAGTTGCTTGCACACAGT     |
| NOL10 mRNA    | GGAGGTCCCGGGATTACG    | TGTAGCGCTCTCTTCTTCT      |
| GAPDH         | AACGGATTTGGTCGTATTGGG | CCTGGAAGATGGTGATGGGAT    |
| HN1           | TGGACACAGACTTGCCAGG   | GACAGCGTTCAGGACAGTCA     |
| HN2           | GCAAACCTTACCCACCTGT   | CTGAACTTAAAAGTCTCTTCACGG |
| HN3           | CAAGTCCCCCGAAACCAGAC  | AGGGTCTAAAGAGCTGTCTGTC   |
| HN5           | GGGTTGCGGTATCCTGAACT  | GGCCTGTTGGCTTGTGTTGAA    |
| HN6           | AACCTCCGAGCAACCTATGC  | ACCCTTGATAGCAGCTACACC    |
| HN8           | GCGGTACCCTAACTGTGCAA  | AGGGCCTGTGGACTTGTTAAG    |
| HN9           | CGTGAAGAGGCGGACATAAT  | ATATGTTGCTCGGAGGTTGG     |
| HN10          | GACATACGTTCAATGGCCGC  | GCTCCATACATAGGGTCTTCTCG  |
| ESRP1         | ACGGAGGACTGCAAAGAAGA  | CTGACATGAAGCTGCCCATC     |
| MeRIP-primer1 | GCAGACAACCCATTTGGTCT  | CTTTTTCCCTCCCTCTTTGG     |
| MeRIP-primer2 | CACCGTGGCTCATGTCTGTA  | ATCTTGGCTCACTGCAACCT     |
| MeRIP-primer3 | GATTTTGATGGGAAGCCAGA  | TGTTCCGACTGTGCTTTCAG     |

| siRNA            | Primer(forward)          | Primer(reverse)          |
|------------------|--------------------------|--------------------------|
| scramble         | UUCUCCGAACGUGUCACGU dTdT | ACGUGACACGUUCGGAGAA dTdT |
| circNOL10 siRNA1 | CAUUCUCCAUUCUGAAGUUUA UU | UAAACUUCAGAAUGGAAUG UU   |
| circNOL10 siRNA2 | UUACAUUCCAUUCUGAAGU UU   | ACUUCAGAAUGGAAUGUAA UU   |
| circNOL10 siRNA3 | CUAUUACAUUCCAUUCUGA UU   | UCAGAAUGGAAUGUAAUAG UU   |
| SCML1 siRNA1     | ACAAACAGAUCUUCUUGCA UU   | UGCAAGAGGAUCUGUUUGU UU   |
| SCML1 siRNA2     | GCACCACCUUCAGUUACAA UU   | UUGUACUGAAGGUGGUGC UU    |
| SCML1 siRNA3     | UGACCGACUUAACAAGGA UU    | UCCUUGUUUAGUCGGUCA UU    |
| ESRP1 siRNA1     | GCUAGGCUCGGAUGAGAAG UU   | CUUCUCAUCCGAGCCUAGC UU   |
| ESRP1 siRNA2     | GCAGCUACAUGUAGUUAGU UU   | ACUAAUCUACAUGUAGCUGC UU  |
| ESRP1 siRNA3     | GAUAGGCAGUAAUGCUUAC UU   | GUAAGCAUUCUGCCUUAUC UU   |

| Probe name                   | Probe sequence                                                             |
|------------------------------|----------------------------------------------------------------------------|
| RAP Group-1 (Pre-NOL10)      | AATTTAGTGACATATTTTGGCCGATTAGAAAAGAGTGATTCTTTCACCTCAACACAGCTATGGTACTCA      |
| RAP Group-2 (Pre-NOL10)      | TCTATCAGATAATGGTGTACTCCCTAAAACAGCAATCTTTTCTTTCTAGACGAGATCAAAGTATGC         |
| RAP Group-3 (Pre-NOL10)      | GCAGCAAAGTATCTGCTTGTGCCAATCTACTTGAGCGGAAGAACCAATTTAAAGGACATGAAAATA         |
| RAP Group-4 (Pre-NOL10)      | AAGTGCTAAAGTCAAACATAAGTAAGTGAAAAACAATCAAGTACAATACAATGGGATTAGTGCCAAAACAGAA  |
| RAP Group-5 (Pre-NOL10)      | AATTTAAATCCAGGTCTAACCCAGAAATCTGTTACCCCTACTGTGAGGCCATGATTCCTTTTGGGAAAC      |
| RAP Group-6 (Pre-NOL10)      | CAAAACAGAACTCCACACTTTTTCCCATAAAATTAGGTCTTTTACCTTCCATAAGATGTCTTATCTTTCCG    |
| RAP Group-7 (Pre-NOL10)      | TCATGTCTAACTCATTTTCTGCTCACATTCACAAGTTGTGACAATCTTTCCGTGTATAGCTTT            |
| RAP Group-8 (Pre-NOL10)      | TCGGCCTCCCAGAGTGCCTTTCTATATTTAATAGTAGTAGCAGAAAAGGGCAAATGCAAAATTTCAATC      |
| RAP Group-9 (Pre-NOL10)      | AGATTATACATGTCTATCTCCAAATTTAGCACCATACTAACAGAAAGCCAAAGATATCACTCCTAAATGAGTCA |
| RAP Group-10 (Pre-NOL10)     | AATAACAATGACTCTAAGCAATGTTAAAGTCCCTACTTCTACCCCTTTTCTCTCCCAATTTCTCAACTACAC   |
| circNOL10-FISH               | CTATAAACTTCAGAAATGGAATGTAATAGA                                             |
| MTRNR2L2-Probe-1             | ATCACCTCTAGCATTATCAGTATTAGAGGCAC                                           |
| MTRNR2L2-Mutant competitor-1 | ATCACCTCTATACCGCGCTACTTAGAGGCAC                                            |
| MTRNR2L2-Probe-2             | CCGGCGTAAAGAGTGTTTTAGATCAATCCCC                                            |
| MTRNR2L2-Mutant competitor-2 | CCGGCGTAAACCGCCGGCCACTCAATCCCC                                             |
| MTRNR2L8-Probe-1             | ATCACCTCTAGCATTCTCAGTATTAGAGGCAC                                           |
| MTRNR2L8-Mutant competitor-1 | ATCACCTCTATACCGCGCTACTTAGAGGCAC                                            |
| MTRNR2L8-Probe-2             | CCGGCATAAAGAGTGTTTTAGATCAATCCCC                                            |
| MTRNR2L8-Mutant competitor-2 | CCGGCATAAAACCGCGCCACTCAATCCCC                                              |
